# Supplementary material for: Development of a hoRizontal data intEgration classifier for NOn-invasive early diAgnosis of breasT cancEr: the RENOVATE study protocol
Source: PubMed Central journal article supplement — BMJ Open. 2021 Dec 31;11(12):e054256. doi: 10.1136/bmjopen-2021-054256 (PMC8720992; doi:10.1136/bmjopen-2021-054256), 2021-12-31
Supplement: bmjopen-2021-054256.draft_revisions.pdf [file bmjopen-2021-054256.draft_revisions.pdf]

# BMJ Open

BMJ Open is committed to open peer review. As part of this commitment we make the peer review history of every article we publish publicly available.

When an article is published we post the peer reviewers' comments and the authors' responses online. We also post the versions of the paper that were used during peer review. These are the versions that the peer review comments apply to.

The versions of the paper that follow are the versions that were submitted during the peer review process. They are not the versions of record or the final published versions. They should not be cited or distributed as the published version of this manuscript.

BMJ Open is an open access journal and the full, final, typeset and author-corrected version of record of the manuscript is available on our site with no access controls, subscription charges or pay-per-view fees (<http://bmjopen.bmj.com>).

If you have any questions on BMJ Open's open peer review process please email [info.bmjopen@bmj.com](mailto:info.bmjopen@bmj.com)

# BMJ Open

## Development of a hoRizontal data intEgration classifier for NOinvasiVe early diAgnosis of breast cancer: the RENOvATE study protocol

|                               |                                                                                                                                                                                                                                                                                                                                                                                                                                                                                                                                                                                                                                                                                                                                                                                                                                                                                                                                                                                                                                                                                                                                                                                                                                                                                                                                           |
|-------------------------------|-------------------------------------------------------------------------------------------------------------------------------------------------------------------------------------------------------------------------------------------------------------------------------------------------------------------------------------------------------------------------------------------------------------------------------------------------------------------------------------------------------------------------------------------------------------------------------------------------------------------------------------------------------------------------------------------------------------------------------------------------------------------------------------------------------------------------------------------------------------------------------------------------------------------------------------------------------------------------------------------------------------------------------------------------------------------------------------------------------------------------------------------------------------------------------------------------------------------------------------------------------------------------------------------------------------------------------------------|
| Journal:                      | <i>BMJ Open</i>                                                                                                                                                                                                                                                                                                                                                                                                                                                                                                                                                                                                                                                                                                                                                                                                                                                                                                                                                                                                                                                                                                                                                                                                                                                                                                                           |
| Manuscript ID                 | bmjopen-2021-054256                                                                                                                                                                                                                                                                                                                                                                                                                                                                                                                                                                                                                                                                                                                                                                                                                                                                                                                                                                                                                                                                                                                                                                                                                                                                                                                       |
| Article Type:                 | Protocol                                                                                                                                                                                                                                                                                                                                                                                                                                                                                                                                                                                                                                                                                                                                                                                                                                                                                                                                                                                                                                                                                                                                                                                                                                                                                                                                  |
| Date Submitted by the Author: | 07-Jun-2021                                                                                                                                                                                                                                                                                                                                                                                                                                                                                                                                                                                                                                                                                                                                                                                                                                                                                                                                                                                                                                                                                                                                                                                                                                                                                                                               |
| Complete List of Authors:     | <p>Ravera, Francesco; Università degli Studi di Genova, Department of internal Medicine</p> <p>Cirmena, Gabriella; Università degli Studi di Genova, Department of internal Medicine</p> <p>Dameri, Martina; Ospedale Policlinico San Martino Istituto di Ricovero e Cura a Carattere Scientifico per l'Oncologia</p> <p>Gallo, Maurizio; Università degli Studi di Genova, Department of internal Medicine</p> <p>Vellone, Valerio; Università degli Studi di Genova, Department of Surgical Sciences and Integrated Diagnostic</p> <p>Fregatti, Piero; Ospedale Policlinico San Martino Istituto di Ricovero e Cura a Carattere Scientifico per l'Oncologia</p> <p>Friedman, Daniele; Ospedale Policlinico San Martino Istituto di Ricovero e Cura a Carattere Scientifico per l'Oncologia</p> <p>Calabrese, Massimo; Ospedale Policlinico San Martino Istituto di Ricovero e Cura a Carattere Scientifico per l'Oncologia</p> <p>Ballestrero, Alberto; University of Genoa, Department of Internal Medicine</p> <p>Tagliafico, Alberto; Università degli Studi di Genova, Department of Health Sciences</p> <p>Ferrando, Lorenzo; Ospedale Policlinico San Martino Istituto di Ricovero e Cura a Carattere Scientifico per l'Oncologia</p> <p>Zoppoli, Gabriele; Università degli Studi di Genova, Department of internal Medicine</p> |
| Keywords:                     | Breast tumours < ONCOLOGY, Breast imaging < RADIOLOGY & IMAGING, Health informatics < BIOTECHNOLOGY & BIOINFORMATICS, Cancer genetics < GENETICS, Adult oncology < ONCOLOGY                                                                                                                                                                                                                                                                                                                                                                                                                                                                                                                                                                                                                                                                                                                                                                                                                                                                                                                                                                                                                                                                                                                                                               |
|                               |                                                                                                                                                                                                                                                                                                                                                                                                                                                                                                                                                                                                                                                                                                                                                                                                                                                                                                                                                                                                                                                                                                                                                                                                                                                                                                                                           |

SCHOLARONE™  
Manuscripts

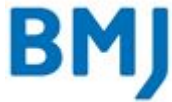

I, the Submitting Author has the right to grant and does grant on behalf of all authors of the Work (as defined in the below author licence), an exclusive licence and/or a non-exclusive licence for contributions from authors who are: i) UK Crown employees; ii) where BMJ has agreed a CC-BY licence shall apply, and/or iii) in accordance with the terms applicable for US Federal Government officers or employees acting as part of their official duties; on a worldwide, perpetual, irrevocable, royalty-free basis to BMJ Publishing Group Ltd ("BMJ") its licensees and where the relevant Journal is co-owned by BMJ to the co-owners of the Journal, to publish the Work in this journal and any other BMJ products and to exploit all rights, as set out in our [licence](#).

The Submitting Author accepts and understands that any supply made under these terms is made by BMJ to the Submitting Author unless you are acting as an employee on behalf of your employer or a postgraduate student of an affiliated institution which is paying any applicable article publishing charge ("APC") for Open Access articles. Where the Submitting Author wishes to make the Work available on an Open Access basis (and intends to pay the relevant APC), the terms of reuse of such Open Access shall be governed by a Creative Commons licence – details of these licences and which [Creative Commons](#) licence will apply to this Work are set out in our licence referred to above.

Other than as permitted in any relevant BMJ Author's Self Archiving Policies, I confirm this Work has not been accepted for publication elsewhere, is not being considered for publication elsewhere and does not duplicate material already published. I confirm all authors consent to publication of this Work and authorise the granting of this licence.

1  
2  
3 **Development of a hoRizontal data intEgration classifier for NoninvasiVe early**  
4 **diAgnosis of breasT cancEr: the RENOVATE study protocol**  
5  
6  
7  
8

9 Authors: Francesco Ravera<sup>1</sup>, Gabriella Cirmena<sup>1</sup>, Martina Dameri<sup>2</sup>, Maurizio Gallo<sup>2</sup>,  
10 Valerio Gaetano Vellone<sup>2,4</sup>, Piero Fregatti<sup>2,4</sup>, Daniele Friedman<sup>2,4</sup>, Massimo Calabrese<sup>2</sup>,  
11 Alberto Ballestrero<sup>1,2</sup> Alberto Tagliafico<sup>2,3,\*</sup>, Lorenzo Ferrando<sup>2,\*</sup>, Gabriele Zoppoli<sup>1,2\*,#</sup>  
12  
13  
14  
15  
16  
17  
18  
19

20 <sup>1</sup>Department of Internal Medicine and Medical Specialties DiMI, University of Genoa,  
21 16132, Italy  
22  
23

24 <sup>2</sup>IRCCS Ospedale Policlinico San Martino, 16132 Genoa, Italy  
25

26 <sup>3</sup>Department of Health Sciences DISSAL, University of Genoa, 16132, Italy  
27

28 <sup>4</sup>Department of Surgical Sciences and Integrated Diagnostic DISC, 16132 Genoa, Italy  
29  
30  
31  
32

33 \*These Authors equally contributed to the present manuscript  
34

35 # Correspondence should be addressed to Gabriele Zoppoli: gabriele.zoppoli@unige.it  
36  
37  
38  
39  
40

41 **Keywords:** breast cancer, early diagnosis, liquid biopsy, circulating biomarkers, radiomics  
42

43 **Word count:** 4459  
44  
45  
46  
47  
48  
49  
50  
51  
52  
53  
54  
55  
56  
57  
58  
59  
60

## Abstract

**Introduction.** Current standards of care for breast cancer (BC) early diagnosis present suboptimal accuracy and imply the execution of invasive and sometimes unnecessary tissue biopsies. The assessment of circulating biomarkers for diagnostic purposes, together with radiomics, is of great potential in BC management.

**Methods.** This is a prospective translational study investigating the accuracy of the combined assessment of multiple circulating analytes together with radiomic variables for early BC diagnosis. Patients are recruited at their presentation at the Diagnostic Senology Unit of Ospedale Policlinico San Martino (Genoa, IT) for the execution of a diagnostic biopsy after the detection of a suspect breast lesion (t0). Each recruited patient is asked to donate peripheral blood and urine before undergoing biopsy. Blood and urine samples are also collected from a cohort of patients with negative mammography. Only for cases with histological diagnosis of invasive BC, a second sample of blood and urine is collected at the first visit after breast surgery. Circulating tumor DNA, cell-free methylated DNA, RNA from peripheral blood mononuclear cells and circulating proteins will be assessed in samples collected at t0 from patients with stage I-IIA BC at surgery together with those collected from patients with histologically confirmed benign lesions of similar size and from healthy controls with negative mammography. These analyses will be combined with radiomics variables extracted with freeware algorithms applied to cases and matched controls for which digital mammography is available. The overall goal of the present study is to develop a horizontal data integration classifier for the early diagnosis of BC.

**Ethics and dissemination.** This research protocol has been approved by Regione Liguria Ethics Committee (reference number: 2019/75, study ID: 4452), and is registered in ClinicalTrials.gov with the ID NCT04781062. Results will be published in international peer-reviewed scientific journals.

## Strengths and limitations

### Strengths

- The study has a prospective design with well-balanced controlled cohorts
- The study assesses the performance of some of the most promising and cutting-edge biomarkers in the field of translational oncology either for diagnostic or predictive purposes in patients affected by BC
- The performance of the combination of multiple circulating biomarkers and radiomics algorithms for BC early diagnosis is assessed
- The study is the first to investigate such biomarkers in early (i.e. stage I-IIA) BC

### Limitations

- The study is not designed for the early diagnosis of *in situ* BCs, which are considered as benign lesions and are included in the control group

## 1.Introduction

Standard of care early diagnosis of breast cancer (BC) relies on the combined use of radiological procedures such as mammography and ultrasound [1,2]. Confirmation biopsy or recall tests are mandatory in case of suspect found during the first examination and bring eventually to a more definite characterization of the radiologically identified lesion. This approach is however burdened by serious issues which include (a) suboptimal sensitivity and positive predictive power respectively for radiological screening and diagnostic approaches, (b) invasiveness of biopsy with discomfort for women undergoing diagnostic tests, along with the risk of drawing non-representative portions of the suspected region considering the genotypic and phenotypic heterogeneity of BCs [3], (c) long turnaround time for recall tests, even in high-level centers. In particular, the suboptimal sensitivity of screening procedures leads to non-diagnosed tumors which become able to advance locally and spread systemically, impacting patients' prognosis, while the suboptimal positive predictive power of diagnostic evaluation implies unnecessary invasive biopsies [1].

1  
2  
3 The compelling necessity of increasing the accuracy of screening and diagnostic procedures  
4 for cancer has brought to a relevant advancement in the pursuit of accurate biomarkers able  
5 to efficiently detect and characterize it, in the panorama of liquid biopsies. To date, however,  
6 no protocol with effective and recognized clinical validity for the early diagnosis of BC has  
7 been developed.  
8  
9  
10  
11  
12

13 Amongst the most promising biomarkers, circulating tumor DNA (ctDNA) and cell-free  
14 methylated DNA (cfMeDNA), exosomes, and microRNA (miRNA) have been the subject of  
15 relevant scientific reports [4–9]. Moreover, machine-learning (so called “deep learning”)  
16 algorithms have been applied to traditional radiology imaging techniques for diagnosis  
17 assistance with exciting results in the field of radiomics [10]. Results in the proteomics field  
18 have instead been few, in part due to the cumbersome methodologies often applied to the  
19 study of these molecules [11].  
20  
21  
22  
23  
24  
25  
26  
27

28 Since it is hardly conceivable that a single biomarker is able to achieve 100% accuracy in the  
29 early detection of BC, the primary aim of the present study is to merge for this purpose the  
30 assessment of multiple biological analytes with the refinement of radiomics algorithms,  
31 overcoming the aforementioned limitations in terms of accuracy of the individual biomarkers.  
32 The concept of combining different data layers to reach a better classifier compared to the  
33 individual analytes is referred to as horizontal data integration (HDI) classification. Therefore,  
34 the overall goal of the project is to develop an HDI classifier enabling early noninvasive  
35 diagnosis of BC with similar accuracy compared to breast biopsies.  
36  
37  
38  
39  
40  
41  
42  
43  
44  
45  
46  
47

## 48 **2. Methods**

### 49 **2.1. Study design**

50 This is a prospective translational case-control study with the primary aim of assessing the  
51 clinical validity of several biomarkers, individually and combined, in the early detection of BC  
52 in a real-life clinical setting (see Figure 1 for study diagram). Patients are recruited at the  
53 presentation to the Diagnostic Senology Unit of Ospedale Policlinico San Martino for the  
54 execution of the breast biopsy after the radiological detection of a suspected breast lesion  $\leq 2$   
55  
56  
57  
58  
59  
60

1  
2  
3 cm (i.e. radiological T1) with no radiological evidence of axillary or distant disease. Blood and  
4  
5 urine samples are collected at this time point (t0) from each recruited patient who fulfills the  
6  
7 inclusion and exclusion criteria mentioned in paragraph 2.3. Of these, only samples collected  
8  
9 from patients with stage I-IIA neoplasia at surgery (T1N0 or T2N0 or T1N1a) or histologically  
10  
11 confirmed benign lesions will be analysed. A second sample is obtained from those patients  
12  
13 with confirmed histological diagnosis of invasive BC at the first oncologic visit after breast  
14  
15 primary surgery (t1) according to normal practice, independently from possible neoadjuvant  
16  
17 treatments. No limitations based on tumor stage will be made for the analysis of the latter.  
18  
19 Blood and urine samples are also collected and analysed from a cohort of 100 healthy women  
20  
21 with two consecutive negative mammograms (BIRADS-1 or BIRADS-0 with negative  
22  
23 ecography) as well.  
24  
25

## 26 27 28 **2.2. Candidate biomarkers**

### 29 30 **2.2.1. Circulating tumor DNA and cell-free Methylated DNA**

31  
32 ctDNA obtained via liquid biopsy has shown serious potential not only in the early diagnosis  
33  
34 of cancer but *inter alia* as an effective marker for its recurrence, longitudinal monitoring and  
35  
36 response to therapy [12]. Current methods for detecting ctDNA however are mostly based on  
37  
38 sequencing somatic mutations from cell-free DNA (cfDNA), a process constrained by relevant  
39  
40 limitations in clinical applicability due to (a) expectable low sensitivity in early stage cancers  
41  
42 given the limited number of recurrent mutations in ctDNA [8,13], (b) the vast heterogeneity of  
43  
44 DNA mutations occurring in a single tumor together with nonspecific mutations profiles along  
45  
46 different patients and cancer types [12,13], (c) current cost-prohibitive impact of cfDNA Next  
47  
48 Generation Sequencing (NGS) for mutation assessment [14]. On the other hand, the  
49  
50 assessment of cfMeDNA may overcome the limitations outlined above. DNA methylation is  
51  
52 commonly involved in cellular development, tissue-specific gene expression, and regulation  
53  
54 of imprinted alleles, with widespread effects on cellular growth and genomic stability [15].  
55  
56 Changes in methylomes in cancer are usually associated with alterations of the transcriptional  
57  
58 outcome and genomic instability, priming or enhancing carcinogenesis. Given the impact of  
59  
60



1  
2  
3 methylation changes on cellular equilibrium, different methylomes may be associated with  
4 specific biological features providing useful information for the early diagnosis of cancer [16].  
5 Shen *et al.* recently developed a sensitive, immunoprecipitation-based protocol to analyze the  
6 methylomes of small quantities of cfDNA, providing an efficient method to detect large-scale  
7 DNA methylation changes that are enriched for tumour-specific patterns [8]. cfMeDNA  
8 immunoprecipitation and high-throughput sequencing (cfMeDIP-seq) was able to find cancer-  
9 derived DNA methylation events in cfDNA and to distinguish multiple cancer types from  
10 healthy controls, besides effectively discriminating different methylation patterns across  
11 diverse cancers.  
12  
13  
14  
15  
16  
17  
18  
19  
20  
21

### 22 **2.2.2. RNA-based biomarkers**

23  
24 RNA-based biomarkers can refer either to coding or non-coding RNAs. Non-coding RNAs,  
25 including miRNAs and long non coding RNAs, have been extensively studied over the last  
26 years as promising markers for cancer early diagnosis and monitoring, being of particular  
27 interest for their stability and quantity in the bloodstream [17]. On the other hand, coding-RNAs  
28 include the cell-free messenger RNA, whose evaluation may allow the non-invasive  
29 assessment of the whole-body transcriptome [18] with relevant implications for several clinical  
30 purposes.  
31  
32  
33  
34  
35  
36  
37  
38

### 39 **2.2.3. Circulating proteins**

40  
41 Proteomic analyses in neoplastic patients have been applied to diverse clinical aims with  
42 suboptimal results, given the challenging characterization of circulating proteins. The  
43 assessment of alterations in protein-mediated signaling networks is of great interest for its  
44 possible implications in the early diagnosis and monitoring of cancer, besides the detection of  
45 potentially actionable targets for therapeutic purposes [11].  
46  
47  
48  
49  
50

## 51 **2.3. Patient recruitment and sampling**

52  
53 To conform as much as possible to a real-life clinical setting, patients are recruited from the  
54 Diagnostics Senology Unit of Ospedale Policlinico San Martino, one of the highest-level  
55 referral centers in Italy. Eligible participants include women with radiologically identified  
56 lesions, BIRADS-3/4/5,  $\leq 2$  cm by radiological assessment (i.e., radiological T1), evaluated at  
57  
58  
59  
60

1  
2  
3 the Diagnostic Senology Unit of this Institution. These patients are asked, upon completion of  
4 an informed written consent, to donate four peripheral blood tubes (30 mL total) and one urine  
5 sample (40 mL). Their pseudo-anonymized radiological images as well as demographic and  
6 anatomopathological data are collected as well, by using a freeware dedicated, state-of-the-  
7 art firewalled data collection system, OpenClinica®, hosted by University of Genoa servers.  
8  
9

10  
11 All patients are screened with the following inclusion and exclusion criteria. Inclusion criteria  
12 include: written informed consent; breast lesions detected by digital bilateral mammography;  
13 age  $\geq$  18 years and  $\leq$  75 years; eligibility for diagnostic biopsy (tru-cut or Vacuum Assisted  
14 Breast Biopsy) as per normal clinical practice for study population, or absence of breast  
15 lesions at the digital mammography for healthy controls (BIRADS-1 or BIRADS-0 with negative  
16 ecography); ability and willfulness to comply with the protocol requirements.  
17  
18

19  
20 Exclusion criteria include: previous history of invasive cancer, any type; clinical or radiological  
21 suspicion of advanced or metastatic cancer at the time of screening; known history of active  
22 or treated autoimmune or manifest chronic or seasonal and active allergic disorders (with the  
23 exception of autoimmune thyroiditis); history of major trauma or surgery during the 24 weeks  
24 before screening; history of active infectious disease, either chronic or acute occurring during  
25 the 8 weeks before screening; history of known acute or chronic cardiac, kidney, or liver  
26 disease disorders or acute cardiac events.  
27  
28  
29  
30  
31  
32  
33  
34  
35  
36  
37  
38  
39  
40  
41  
42

## 43 **2.4. Sample collection**

### 44 **2.4.1. Peripheral blood and urine collection, processing and storage**

45  
46 One investigator, a research nurse, and two biologists are collaborating in the first eighteen  
47 months of the project to collect at t0 and t1 two PAXgene® Blood ccfDNA Tubes CE-IVD ( (  
48 PreAnalytix, GmbH), one BD Vacutainer® K2E ( EDTA) Plus Blood Collection Tube CE-IVD  
49 (BD life Sciences), one Tempus TM Blood RNA tube (Applied Biosystems), and one urine  
50 specimen in a sterile container. Blood samples are processed to extract and store cfDNA from  
51 plasma, and to collect proteins, exosomes, PBMCs, and total RNA . During sample processing  
52 PAXgene tubes are first centrifuged for 15 minutes at 1900 rpm at room temperature (RT)  
53  
54  
55  
56  
57  
58  
59  
60

1  
2  
3 then the collected plasma is centrifuged for further 10 minutes at 1900 rpm at RT. EDTA tubes  
4 are centrifuged for 15 minutes at 1600 rpm at RT and the collected plasma is centrifuged at  
5 1900 rpm for further 10 minutes at RT. Plasma is then aliquoted in cryovials. Tempus tubes  
6 for total RNA extraction are immediately stored at -80°C. At the moment of collection, urine is  
7 mixed with Cell-Free DNA Urine Preserve (Streck) in order to stabilize cfDNA in samples for  
8 up to 7 days at 6 °C to 37 °C. Urine is centrifuged at 2680 rpm for 10 minutes, and the  
9 supernatant is aliquoted into 15 mL tubes and stored at -80°C until cfDNA extraction. Samples  
10 are stored at -80°C in a dedicated, Eppendorf CryoCube F740hi ULT Freezer, 3  
11 Compartments.  
12

13 All test tubes, from blood collection to storage, are barcoded to increase traceability and  
14 anonymity to external personnel.  
15  
16

#### 2.4.2. Resources

17 A 150 sqm fully equipped laboratory supports the pivotal work on the samples collected for  
18 our project. All procedures of platelet separation and plasma processing, cfDNA and RNA  
19 extraction, quality control, amplification, library preparation and sequencing happen in  
20 separate, clean environments optimized for such tasks. Every operation from sample  
21 processing, to nucleic acid extraction and sequencing is semi-automated in order to minimize  
22 cross-sample contamination issues and ensure optimal reproducibility and consistency of  
23 operations. A dedicated freezer is available in the laboratories for sample storage. The  
24 laboratory is equipped with a ThermoFisher Scientific Ion™ S5 XL sequencer. Data collection  
25 and the dry-lab part of the analyses are performed on high performance workstations  
26 maintained in high-security, dedicated environments to avoid the risk of data loss and sensible  
27 data cyber-theft.  
28  
29

## 2.5. Analysis and integration of circulating biomarkers with radiomics

### 2.5.1. Ultrasensitive NGS on ctDNA

1  
2  
3 We designed a tagged-amplicon NGS panel covering 101 short regions of frequently mutated  
4 genes in BC. For this task, we analyzed the GENIE dataset v3.0 [19], which includes 3,269  
5 sequenced primary and metastatic BC. Amongst the more common cancer genes in BC, very  
6 few behave as dominant oncogenes (i.e. with frequent mutation in limited regions of the gene,  
7 like PIK3CA), whereas several behave as tumor suppressors (i.e., with rare mutations  
8 occurring along the whole gene, like CDH1). By dividing all the genes sequenced by GENIE  
9 into 9,603 regions shorter than 50 base pairs, we realized that to detect at least one mutation,  
10 we would need to sequence only 101 regions to cover 80% of the whole GENIE dataset, but  
11 420 regions to increase such detection rate to 88%. In particular, amplicons covering TP53  
12 (30 regions), CDH1 (50 regions), GATA3 (13 regions), and PIK3CA (7 regions) would optimize  
13 the coverage by minimizing the size of our panel. The 101 selected regions will be assessed  
14 in plasma ctDNA using a custom design, which leverages the novel, proprietary tagged-  
15 amplicon OncoMine™cfDNA methodology by ThermoFisher Scientific Inc. Its use allows for a  
16 limit of detection of 0.1% at 20,000x sequencing coverage with 20 ng of circulating DNA, well  
17 attainable with two peripheral blood samples collected in PAXgene tubes. cfDNA extraction is  
18 performed by using the QIAamp Mini Elute cfDNA Mini or Midi Kit (Qiagen, Hilden, Germany)  
19 on the Qiacube system, according to the Manufacturer's instructions. cfDNA is processed on  
20 an Ion Chef™ fluidic handler, and sequenced using the tagged-amplicon methodology with our  
21 custom-design panel using as per manufacturer's specifications on a Ion S5™ sequencer.  
22 Tertiary analysis will be performed on a dedicated Ion Server System available in our  
23 laboratory. The library size of our custom panel is half of the commercial ThermoFisher  
24 Scientific Ion Torrent™ OncoMine™ Comprehensive cfDNA™ panel, from which the  
25 aforementioned performance considerations have been derived. Hence, the use of our  
26 custom-design panel appears feasible and should perform better in light of its smaller size and  
27 subsequent deeper attainable sequencing coverage.

### 28 **2.5.2. Methylome profiling of cfDNA**

1  
2  
3 Recent works pointed out astonishing results in terms of accuracy of cfMeDIP-seq in the  
4 detection of informative methylation changes of small quantities (1-10 ng) of plasma cfDNA  
5 for the diagnosis of renal cell carcinoma and intracranial tumors [20,21], with the former being  
6 effectively detected also by cfMeDIP-seq applied to urinary cfDNA. For this study cfDNA will  
7 be extracted with the QIAamp Mini Elute cfDNA Mini or Midi Kit (Qiagen, Hilden, Germany) on  
8 the Qiacube system from plasma and urine. According to the protocol elaborated by Shen *et*  
9 *al.*, cfMeDIP involves four steps: 1) cfDNA end repair, A-tailing and adapter ligation; 2)  
10 cfMeDIP immunoprecipitation and enrichment using an antibody targeting 5 methylcytosine;  
11 3) library preparation; 4) high throughput NGS on an Illumina platform for cfMeDNA data [22].  
12 This approach based on immunoprecipitation allows to avoid cfDNA bisulfite treatment,  
13 typically used to study DNA methylation but burdened by the high rate of DNA degradation  
14 during the process.

### 28 **2.5.3. Proteomics analysis**

30 The proposed task is based on the relative quantification of blood proteins by a novel, highly  
31 multiplexed proteomic assay (SomaScan™) [23,24]. SomaScan™ (SomaLogic™) is  
32 considered the most comprehensive protein array available so far for the relative quantification  
33 of proteins. Over 7,000 proteins can be simultaneously analyzed starting from 55 µL of plasma.  
34 This technology involves a new type of aptamers, which are single stranded DNA molecules  
35 able to bind proteins, called SOMAmers. In addition to their high affinity for individual proteins,  
36 SOMAmers have a unique 40-nucleotide sequence tag and a fluorescent label that allows  
37 their identification and quantification in high-density microarrays. SOMAmers have been  
38 successfully assembled in a commercial product allowing the comparative evaluation of  
39 proteins in as low as 55µl of serum or plasma (or other biological fluids). The SOMAscan™  
40 assay is a highly multiplexed, sensitive, quantitative, and reproducible proteomic tool for  
41 biomarker discovery and development. SomaScan™ can detect proteins within a range of 10  
42 logarithms, allowing for an unmatched sensitivity to detect even femtomolar protein  
43 concentrations. The analysis of the SomaScan™ is performed using classic DNA array data  
44  
45  
46  
47  
48  
49  
50  
51  
52  
53  
54  
55  
56  
57  
58  
59  
60

1  
2  
3 analysis and is based on bioinformatics tools that have been developed for gene array  
4  
5 analysis.

#### 6 7 **2.5.4. Radiomics analyses**

8  
9 A preliminary radiomics classifier has been developed by the Diagnostics Senology team of  
10 Ospedale Policlinico San Martino, based on digital breast tomosynthesis (DBT) images of  
11 consecutive participants from the ASTOUND trial [2]. Radiomics analyses were performed on  
12  
13 all DBT images within manually selected regions of interest (ROIs) including all the dense  
14 parts of the breast and excluding the fatty parts. ROIs were selected by a single radiologist,  
15  
16 with proven expertise in quantitative image analysis. Descriptors of the preliminary classifier  
17  
18 were selected after initial screening of 104 radiomics features to reduce the risk of over-fitting  
19  
20 and according to features previously used to associate breast parenchymal patterns with  
21  
22 cancer risk [25]. For the present project, image features will be extracted from the same cases  
23  
24 and matched controls for whom NGS and proteomics analyses are performed, using an open  
25  
26 source software platform for medical image informatics, and will make use of the advanced  
27  
28 deep learning methodologies mastered by our External Collaborators (An.B.).  
29  
30  
31  
32  
33

#### 34 35 **2.5.5. HDI classifier**

36  
37 Data from ctDNA analysis, cfMeDNA tests, proteomics, and radiomics classifiers will be  
38  
39 processed and used to generate the HDI model, based on the ensemble learning approach  
40  
41 methodology. Ensemble learning combines predictions of multiple individual classifiers  
42  
43 obtained by different techniques such as random forest, support vector machine or general  
44  
45 linear modeling in order to enhance generalization power [26], avoid overfitting, and increase  
46  
47 the strength and reliability of the final outcome [27]. Specifically, the outcomes from ctDNA,  
48  
49 cfMeDNA, proteomics and radiomics tests will be combined by using a weighted-majority  
50  
51 voting approach implemented in the R environment (caret package).  
52  
53

#### 54 55 **2.5.6. Experimental validation and other analyses**

56  
57 Upon completion of proteomics experiments, we will seek to validate the possible discovery  
58  
59 of novel protein biomarkers and to facilitate their transfer to clinical applicability by performing  
60  
conventional protein immunoassays. Other promising noninvasive biomarkers will be studied,

1  
2  
3 thanks to the unique sample set at our disposal. We foresee the possibility to perform  
4  
5  
6  
7  
8  
9  
10  
11  
12  
13  
14  
15  
16  
17  
18  
19  
20  
21  
22  
23  
24  
25  
26  
27  
28  
29  
30  
31  
32  
33  
34  
35  
36  
37  
38  
39  
40  
41  
42  
43  
44  
45  
46  
47  
48  
49  
50  
51  
52  
53  
54  
55  
56  
57  
58  
59  
60

thanks to the unique sample set at our disposal. We foresee the possibility to perform  
exosome-enriched miRNA sequencing, PBMC transcriptome sequencing by using the  
Ampliseq™ Transcriptome solution on our Ion S5™ XL sequencer. Eventually, such analyses  
may be integrated into the HDI classifier to reach an even higher accuracy for early BC  
diagnosis.

## 2.6. Study outcomes

This study aims to assess the performance of multiple analytes either individually or combined  
in a HDI classifier in the early detection of BC. The primary outcome is defined upon the  
histopathological diagnosis of early invasive BC characterized as per SIAPEC/ASCO/CAP  
criteria, with radiological extension  $\leq 2$  cm (radiological T1) and stage I-IIA at surgery (T1N0  
or T2N0 or T1N1a). Benign lesions are defined upon the detection of radiological lesions  $\leq 2$   
cm without the presence of invasive neoplasia at the first biopsy and at surgery, if performed.  
*In situ* tumors are included in the latter group.

## 2.7. Clinical data

Electronic case report forms (eCRF) have been designed for the annotation of patients' clinical  
data. These include study participants' demographics, biometric parameters such as height,  
weight and BMI, assumption of alcohol and smoke, information about the endocrine status  
(pre- or post-menopause, age at menarche, assumption of endocrine therapy, number of  
pregnancies), familiarity for BC and predisposing mutations, comorbidities. Items included in  
the eCRF are provided in **Tab. 1**

## 2.8. Data security and confidentiality

Patients' pseudo-anonymized radiological images as well as demographic and  
anatomopathological data are collected according to the local ethics committee guidelines  
using a dedicated, state-of-the-art firewalled data collection system, OpenClinica®, hosted by  
University of Genova servers.

### 3. STATISTICAL ANALYSIS

#### 3.1. Projected sample size

The Diagnostics Senology Unit of San Martino Hospital is the highest-level referral center in Italy for a population basin of more than 2,000,000 people. In a single year, approximately 15,000 mammograms are performed (Figure 2). Of these, 1,500 yield a radiologic suspicion of malignancy with an ensuing biopsy. Assuming a 50% refusal rate by our patients to undergo trial-specific blood collection, we foresee to enroll 750 patients with radiologically suspect small breast lesions. Among these patients, we assume diagnosis of invasive BC will be confirmed in one third. Of these 250 bioptic diagnoses of BC, which will undergo primary surgery, as per internal historical records, 40% are assumed to be pT1 and 60% higher than pT1. Assuming another 10% failure rate in sample processing and storage, we will have the potential to collect imaging data and samples from approximately 90 patients with pT1 BC and 180 radiological size-matched lesions in a single year (Figure 2). Patient enrollment and t0 sample collection is projected in a time frame of 12 months from the beginning of the study, whereas t1 sample collection is expected approximately 6 months after the enrollment of the last patient.

#### 3.2. Sample size calculation

The sample size required for our analyses is  $N = 147$ , with 49 biopsy-proven stage I-IIA BC cases and 98 biopsy-proven benign lesions of similar radiological size. In particular, assuming that the best non-HDI classifier is, in the end, the one with the highest number of tested variables (worst-case scenario, e.g., transcriptome sequencing on platelets with approximately 20,000 transcripts analyzed), we would need [28,29]:

-  $N = 87$  samples for a training set, in a 1:2 ratio between bioptically proven BCs and



1  
2  
3 radiological size-matched benign lesions, with a standardized fold change of 1.2,  $n \sim 20,000$   
4 features to be assessed, tolerance = 0.05 from the best possible classifier, as defined by  
5 Dobbin *et al.* [29];  
6  
7

8  
9 - N = 26 samples for a testing set (70/30 split of samples between training and testing set)  
10 with similar ratio of cases and controls;  
11

12  
13 - N = 34 samples for a validation set (30% of the sum of training and testing sets).  
14

15 It may be possible that, adopting HDI classification, the actual needed sample size will be  
16 smaller than calculated. At present however, we are not aware of well-established statistical  
17 approaches to obtain a more robust estimation of the number needed for our experiments  
18 other than the one we adopted.  
19  
20  
21  
22  
23  
24  
25

#### 26 **4. Ethics and dissemination**

27  
28 Written informed consents are obtained from each study participant. Participant information  
29 sheet includes the main information of the study protocol, the known side effects or any risks  
30 implied in the participation to the study, and the contact information of study investigators. All  
31 data are deidentified and no patient-related information will be revealed during analysis. The  
32 Regione Liguria Ethics Committee c/o Ospedale Policlinico San Martino has approved the  
33 study (reference number: 2019/75, study ID: 4452).  
34  
35  
36

37 All information concerning patients included in this study are covered by strict confidentiality  
38 in compliance with the General Data Protection Regulation EU 2016/679 (GDPR) and D.lgs.  
39 30.06.2003, n. 196, as modified from D.lgs. 10.08.2018, n. 101. The study is conducted in  
40 accordance with the national law and according to international guidelines for the conduction  
41 of clinical trials referred to as "Good Clinical Practice".  
42  
43  
44  
45  
46  
47  
48  
49  
50  
51

#### 52 **5. Amendments**

53  
54 The original protocol for this study underwent three amendments, mainly aimed at including  
55 the assessment of urinary biomarkers and expanding the cohort of analysed patients.  
56  
57  
58  
59  
60

### 5.1. Amendment #1: collection and analysis of urine samples

The first amendment to this protocol, presented on February 18th 2020, involved the collection and analysis of urine samples in addition to blood samples, which was not included in the original version. An efficient method for the early diagnosis of BC based on the assessment of urinary biomarkers would substantially eliminate the invasiveness of the overall procedure, possibly facilitating the execution of large-scale screening campaigns.

### 5.2. Amendment #2: healthy controls

The second amendment, presented on February 4th 2021, involved the recruitment and analysis of the cohort of 100 healthy women with negative mammography (BIRADS-1 or BIRADS-0 with adjunct negative ecography) as a healthy control group, in addition to patients undergoing breast biopsies. As the presence of benign breast lesions may determine possible variations in blood and urinary analytes, especially in case of *in situ* tumors, the purpose of the present amendment is to possibly categorize patients upon the presence or absence of non-malignant breast lesions, enhancing the accuracy and of the HDI classifier.

### 5.3. Amendment #3: redefinition of the study cohort

The third and final amendment, presented on May 27th 2021, involved several substantial points. According to the original protocol, concerning the cohort of patients with histological diagnosis of invasive BC, only samples collected at t0 from patients with T1N0 tumor at surgery would have been analysed. Moreover, the collection and analysis of t1 samples would have involved only this group of patients, with the exclusive aim of distinguishing between tumor- and host-specific molecular alterations in connection with the presence/absence of BC. With the present amendment, samples collected at t0 will be analysed from patients assessed as with stage I-IIA tumor at surgery (T1N0 or T2N0 or T1N1a), allowing an effective expansion of the sample size, while remaining in the setting of early stage BC diagnosis. Furthermore, the collection and analysis of t1 samples will include all patients diagnosed as with invasive BC and sampled at t1, without limitations in terms of tumor stage assessed at surgery. The

1  
2  
3 analysis of t1 samples, coupled with patients' longitudinal monitoring performed as per normal  
4 clinical practice, will allow the assessment of the accuracy of a multi-analyte evaluation for the  
5 prediction of BC recurrence, added as exploratory aim of the present study.  
6  
7  
8  
9

## 10 11 **6.DISCUSSION**

12  
13 The assessment of circulating biomarkers for clinical purposes is currently burdened by  
14 several issues, including suboptimal accuracy and lacking standardization of pre-analytical  
15 and analytical procedures. The overcoming of these limitations would allow the achievement  
16 of minimally invasive and personalized assays for the management of neoplastic patients,  
17 either in the diagnostic setting or in the early detection of recurrence or the prediction of the  
18 response to therapy, possibly replacing or implementing current protocols based on traditional  
19 tissue biopsies. One of the most effective strategies carried out to enhance the accuracy of  
20 liquid biopsies is the contemporary assessment of multiple analytes, which has already shown  
21 augmented sensitivity and specificity compared to the evaluation of single biomarkers [30].  
22 Such implementation can occur at different levels of complexity, involving different kinds of  
23 integration. A basic integration can be referred to the combination of biomarkers of the same  
24 kind, such as DNA-DNA or protein-protein combinations. On the other hand, an advanced  
25 integration refers to the combined assessment of different kinds of analytes, such as DNA-  
26 protein, or the combination of circulating biomarkers with radiological procedures possibly  
27 refined with radiomics [30].  
28  
29  
30  
31  
32  
33  
34  
35  
36  
37  
38  
39  
40  
41  
42  
43  
44

45 The purpose of this study is to evaluate the performance of the combination of multiple  
46 circulating biomarkers, either plasmatic or urinary, and radiomics for BC early diagnosis in  
47 patients recruited from a real-life clinical setting. At the enrollment, patients undergo a rigorous  
48 selection in order to avoid possible confounding factors that can affect the assessment of  
49 tumor-specific cfMeDNA, circulating RNA, and proteins. Only samples collected from patients  
50 presenting an early-stage disease (I and IIA) at diagnosis will be analysed for this aim. This  
51 selection allows us to assess the effective potential of current techniques for the evaluation of  
52 circulating biomarkers in the early diagnosis of the most common cancer worldwide.  
53  
54  
55  
56  
57  
58  
59  
60

1  
2  
3 Conversely, there will be no limits based on tumor stage for the analysis of circulating  
4 biomarkers collected after surgery, this being aimed at the prediction of BC recurrence.  
5

6  
7 In conclusion, the protocol outlined above presents relevant advantages compared to other  
8 studies aimed at the same purpose, including the application of recent and cutting-edge  
9 techniques to a selected but realistic cohort of patients, possibly bringing to effective  
10 advancements to current protocols for the management of BC patients, and directing future  
11 researches in the panorama of translational medicine applied to oncology.  
12  
13  
14  
15  
16

17  
18  
19  
20 **Author statement.** GZ conceived the study. FR wrote the manuscript. GC and MD provided  
21 a significant contribution in the Methods section of the manuscript. MG, VGV, PF, DF, MC,  
22 AB, AT, and LF critically reviewed the manuscript draft.  
23  
24

25  
26 **Funding statement.** This trial is entirely supported by a Fondazione AIRC per la Ricerca sul  
27 Cancro Investigator Grant ID 21761 to Gabriele Zoppoli.  
28  
29

30 **Competing interests.** The authors declare no conflict of interest for the present study.  
31  
32  
33  
34  
35  
36

### 37 **Figure legends**

38  
39  
40  
41 **Figure 1. Study diagram.** Blood and urine samples will be collected from patients yielding a  
42 radiological breast lesion  $\leq 2$  cm with no evidence of lymph node disease (radiological T1N0).  
43 Images and samples acquired from patients with stage I-IIA (T1N0 or T2N0 or T1N1a  
44 neoplasia) BC at surgery will be analysed for diagnostic purposes together with images and  
45 samples acquired from patients yielding benign breast lesions and from patients with negative  
46 mammography. Blood and urine samples will be re-collected from all patients yielding invasive  
47 neoplasia at diagnosis after surgery at the first oncologic visit, and will be analysed for the  
48 prediction of BC recurrence.  
49  
50  
51  
52  
53  
54  
55  
56  
57  
58  
59  
60

**Figure 2. Sample size diagram.** Approximately 1,500 breast biopsies per year are performed at the Diagnostics Senology Unit of San Martino Hospital. Of a projected number of 750 liquid biopsies we foresee to collect samples and acquire mammograms from at least 49 patients with stage I-IIA BC and 98 patients with radiological size-matched lesions, along with those samples and images acquired from 100 healthy women with two consecutive negative mammograms.

| Biometrics | Voluptuous habits                                       | Endocrine status                                         | Predisposition                                                      | Comorbidities                           |
|------------|---------------------------------------------------------|----------------------------------------------------------|---------------------------------------------------------------------|-----------------------------------------|
| Height     | Does/Did the patient smoke?                             | Is the patient in the pre- or post menopause phase?      | Does the patient present predisposing mutations for cancer?         | Does the patient present comorbidities? |
| Weight     | If yes, for how many years?                             | Age at menarche                                          | If yes, which one                                                   | If yes, which ones?                     |
| BMI        | Packets/day                                             | Number of pregnancies                                    | Does the patient have familiarity for breast and/or ovarian cancer? |                                         |
|            | Years since the last cigarette                          | Does the patient assume sostitutive endocrine therapy?   |                                                                     |                                         |
|            | How many alcohol units does the patient assume per day? | If yes, for how many years?                              |                                                                     |                                         |
|            |                                                         | Does the patient assume endocrine contraceptive therapy? |                                                                     |                                         |
|            |                                                         | If yes, for how many years?                              |                                                                     |                                         |

**Tab. 1. Items investigated at the recruitment.** Along with items concerning the inclusion and exclusion criteria, all patients will be asked about information of interest for the assessment of BC risk and possible interference with the evaluation of circulating biomarkers.

## References

- 1 Sprague BL, Arao RF, Miglioretti DL, *et al.* National Performance Benchmarks for Modern Diagnostic Digital Mammography: Update from the Breast Cancer Surveillance Consortium. *Radiology* 2017;**283**:59–69. doi:10.1148/radiol.2017161519
- 2 Tagliafico AS, Calabrese M, Mariscotti G, *et al.* Adjunct Screening With Tomosynthesis or Ultrasound in Women With Mammography-Negative Dense Breasts: Interim Report of a Prospective Comparative Trial. *J Clin Oncol* 2016;**34**:1882–8. doi:10.1200/JCO.2015.63.4147
- 3 Chung W, Eum HH, Lee H-O, *et al.* Single-cell RNA-seq enables comprehensive tumour and immune cell profiling in primary breast cancer. *Nat Commun* 2017;**8**:15081. doi:10.1038/ncomms15081
- 4 Bettgowda C, Sausen M, Leary RJ, *et al.* Detection of circulating tumor DNA in early- and late-stage human malignancies. *Sci Transl Med* 2014;**6**:224ra24. doi:10.1126/scitranslmed.3007094
- 5 Cohen JD, Li L, Wang Y, *et al.* Detection and localization of surgically resectable cancers with a multi-analyte blood test. *Science* 2018;**359**:926–30. doi:10.1126/science.aar3247
- 6 Best MG, Sol N, Kooi I, *et al.* RNA-Seq of Tumor-Educated Platelets Enables Blood-Based Pan-Cancer, Multiclass, and Molecular Pathway Cancer Diagnostics. *Cancer Cell* 2015;**28**:666–76. doi:10.1016/j.ccell.2015.09.018
- 7 Bhome R, Del Vecchio F, Lee G-H, *et al.* Exosomal microRNAs (exomiRs): Small molecules with a big role in cancer. *Cancer Lett* 2018;**420**:228–35. doi:10.1016/j.canlet.2018.02.002

- 1  
2  
3 8 Shen SY, Singhanian R, Fehringer G, *et al.* Sensitive tumour detection and classification  
4 using plasma cell-free DNA methylomes. *Nature* 2018;**563**:579–83.  
5  
6 doi:10.1038/s41586-018-0703-0  
7  
8  
9  
10 9 Kalluri R. The biology and function of exosomes in cancer. *J Clin Invest* 2016;**126**:1208–  
11 15. doi:10.1172/JCI81135  
12  
13  
14  
15 10 Valdora F, Houssami N, Rossi F, *et al.* Rapid review: radiomics and breast cancer.  
16 *Breast Cancer Res Treat* 2018;**169**:217–29. doi:10.1007/s10549-018-4675-4  
17  
18  
19  
20 11 Bhawal R, Oberg AL, Zhang S, *et al.* Challenges and Opportunities in Clinical  
21 Applications of Blood-Based Proteomics in Cancer. *Cancers* 2020;**12**.  
22 doi:10.3390/cancers12092428  
23  
24  
25  
26  
27 12 Alimirzaie S, Bagherzadeh M, Akbari MR. Liquid biopsy in breast cancer: A  
28 comprehensive review. *Clin Genet* 2019;**95**:643–60. doi:10.1111/cge.13514  
29  
30  
31  
32 13 Aravanis AM, Lee M, Klausner RD. Next-Generation Sequencing of Circulating Tumor  
33 DNA for Early Cancer Detection. *Cell* 2017;**168**:571–4. doi:10.1016/j.cell.2017.01.030  
34  
35  
36  
37 14 Bennett NC, Farah CS. Next-generation sequencing in clinical oncology: next steps  
38 towards clinical validation. *Cancers* 2014;**6**:2296–312. doi:10.3390/cancers6042296  
39  
40  
41  
42 15 Stirzaker C, Taberlay PC, Statham AL, *et al.* Mining cancer methylomes: prospects and  
43 challenges. *Trends Genet* 2014;**30**:75–84. doi:10.1016/j.tig.2013.11.004  
44  
45  
46  
47 16 Salomon MP, Orozco JIJ, Wilmott JS, *et al.* Brain metastasis DNA methylomes, a novel  
48 resource for the identification of biological and clinical features. *Sci Data*  
49 2018;**5**:180245. doi:10.1038/sdata.2018.245  
50  
51  
52  
53 17 Anfossi S, Babayan A, Pantel K, *et al.* Clinical utility of circulating non-coding RNAs - an  
54 update. *Nat Rev Clin Oncol* 2018;**15**:541–63. doi:10.1038/s41571-018-0035-x  
55  
56  
57  
58  
59  
60

- 1  
2  
3 18 Koh W, Pan W, Gawad C, *et al.* Noninvasive in vivo monitoring of tissue-specific global  
4 gene expression in humans. *Proc Natl Acad Sci U S A* 2014;**111**:7361–6.  
5  
6 doi:10.1073/pnas.1405528111  
7  
8  
9  
10  
11 19 AACR Project GENIE Consortium. AACR Project GENIE: Powering Precision Medicine  
12 through an International Consortium. *Cancer Discov* 2017;**7**:818–31. doi:10.1158/2159-  
13 8290.CD-17-0151  
14  
15  
16  
17 20 Nuzzo PV, Berchuck JE, Korthauer K, *et al.* Detection of renal cell carcinoma using  
18 plasma and urine cell-free DNA methylomes. *Nat Med* 2020;**26**:1041–3.  
19  
20 doi:10.1038/s41591-020-0933-1  
21  
22  
23  
24 21 Nassiri F, Chakravarthy A, Feng S, *et al.* Detection and discrimination of intracranial  
25 tumors using plasma cell-free DNA methylomes. *Nat Med* 2020;**26**:1044–7.  
26  
27 doi:10.1038/s41591-020-0932-2  
28  
29  
30  
31  
32 22 Shen SY, Burgener JM, Bratman SV, *et al.* Preparation of cfMeDIP-seq libraries for  
33 methylome profiling of plasma cell-free DNA. *Nat Protoc* 2019;**14**:2749–80.  
34  
35 doi:10.1038/s41596-019-0202-2  
36  
37  
38  
39 23 Webber J, Stone TC, Katilius E, *et al.* Proteomics analysis of cancer exosomes using a  
40 novel modified aptamer-based array (SOMAscan™) platform. *Mol Cell Proteomics*  
41 2014;**13**:1050–64. doi:10.1074/mcp.M113.032136  
42  
43  
44  
45  
46 24 Raffield LM, Dang H, Pratte KA, *et al.* Comparison of Proteomic Assessment Methods in  
47 Multiple Cohort Studies. *Proteomics* 2020;**20**:e1900278. doi:10.1002/pmic.201900278  
48  
49  
50  
51 25 Lambin P, van Stiphout RGPM, Starmans MHW, *et al.* Predicting outcomes in radiation  
52 oncology--multifactorial decision support systems. *Nat Rev Clin Oncol* 2013;**10**:27–40.  
53  
54 doi:10.1038/nrclinonc.2012.196  
55  
56  
57  
58 26 Dietterich TG. Machine-learning research; four current directions. <https://go.gale.com> ›  
59  
60



- 1  
2  
3 *i.do*<https://go.gale.com> > *i.do*  
4  
5 1997;**18**:97+.[https://go.gale.com/ps/i.do?id=GALE%7CA20475202&sid=googleScholar&](https://go.gale.com/ps/i.do?id=GALE%7CA20475202&sid=googleScholar&v=2.1&it=r&linkaccess=abs&issn=07384602&p=AONE&sw=w)  
6  
7 [v=2.1&it=r&linkaccess=abs&issn=07384602&p=AONE&sw=w](https://go.gale.com/ps/i.do?id=GALE%7CA20475202&sid=googleScholar&v=2.1&it=r&linkaccess=abs&issn=07384602&p=AONE&sw=w)  
8  
9  
10 27 Thrun S, Pratt L. Learning to Learn: Introduction and Overview. In: Thrun S, Pratt L,  
11 eds. *Learning to Learn*. Boston, MA: : Springer US 1998. 3–17. doi:10.1007/978-1-  
12 4615-5529-2\_1  
13  
14  
15  
16  
17 28 Dobbin KK, Simon RM. Sample size planning for developing classifiers using high-  
18 dimensional DNA microarray data. *Biostatistics* 2007;**8**:101–17.  
19  
20 doi:10.1093/biostatistics/kxj036  
21  
22  
23  
24 29 Dobbin KK, Zhao Y, Simon RM. How large a training set is needed to develop a  
25 classifier for microarray data? *Clin Cancer Res* 2008;**14**:108–14. doi:10.1158/1078-  
26 0432.CCR-07-0443  
27  
28  
29  
30  
31 30 Qiu J, Xu J, Zhang K, *et al*. Refining Cancer Management Using Integrated Liquid  
32 Biopsy. *Theranostics* 2020;**10**:2374–84. doi:10.7150/thno.40677  
33  
34  
35  
36  
37  
38  
39  
40  
41  
42  
43  
44  
45  
46  
47  
48  
49  
50  
51  
52  
53  
54  
55  
56  
57  
58  
59  
60

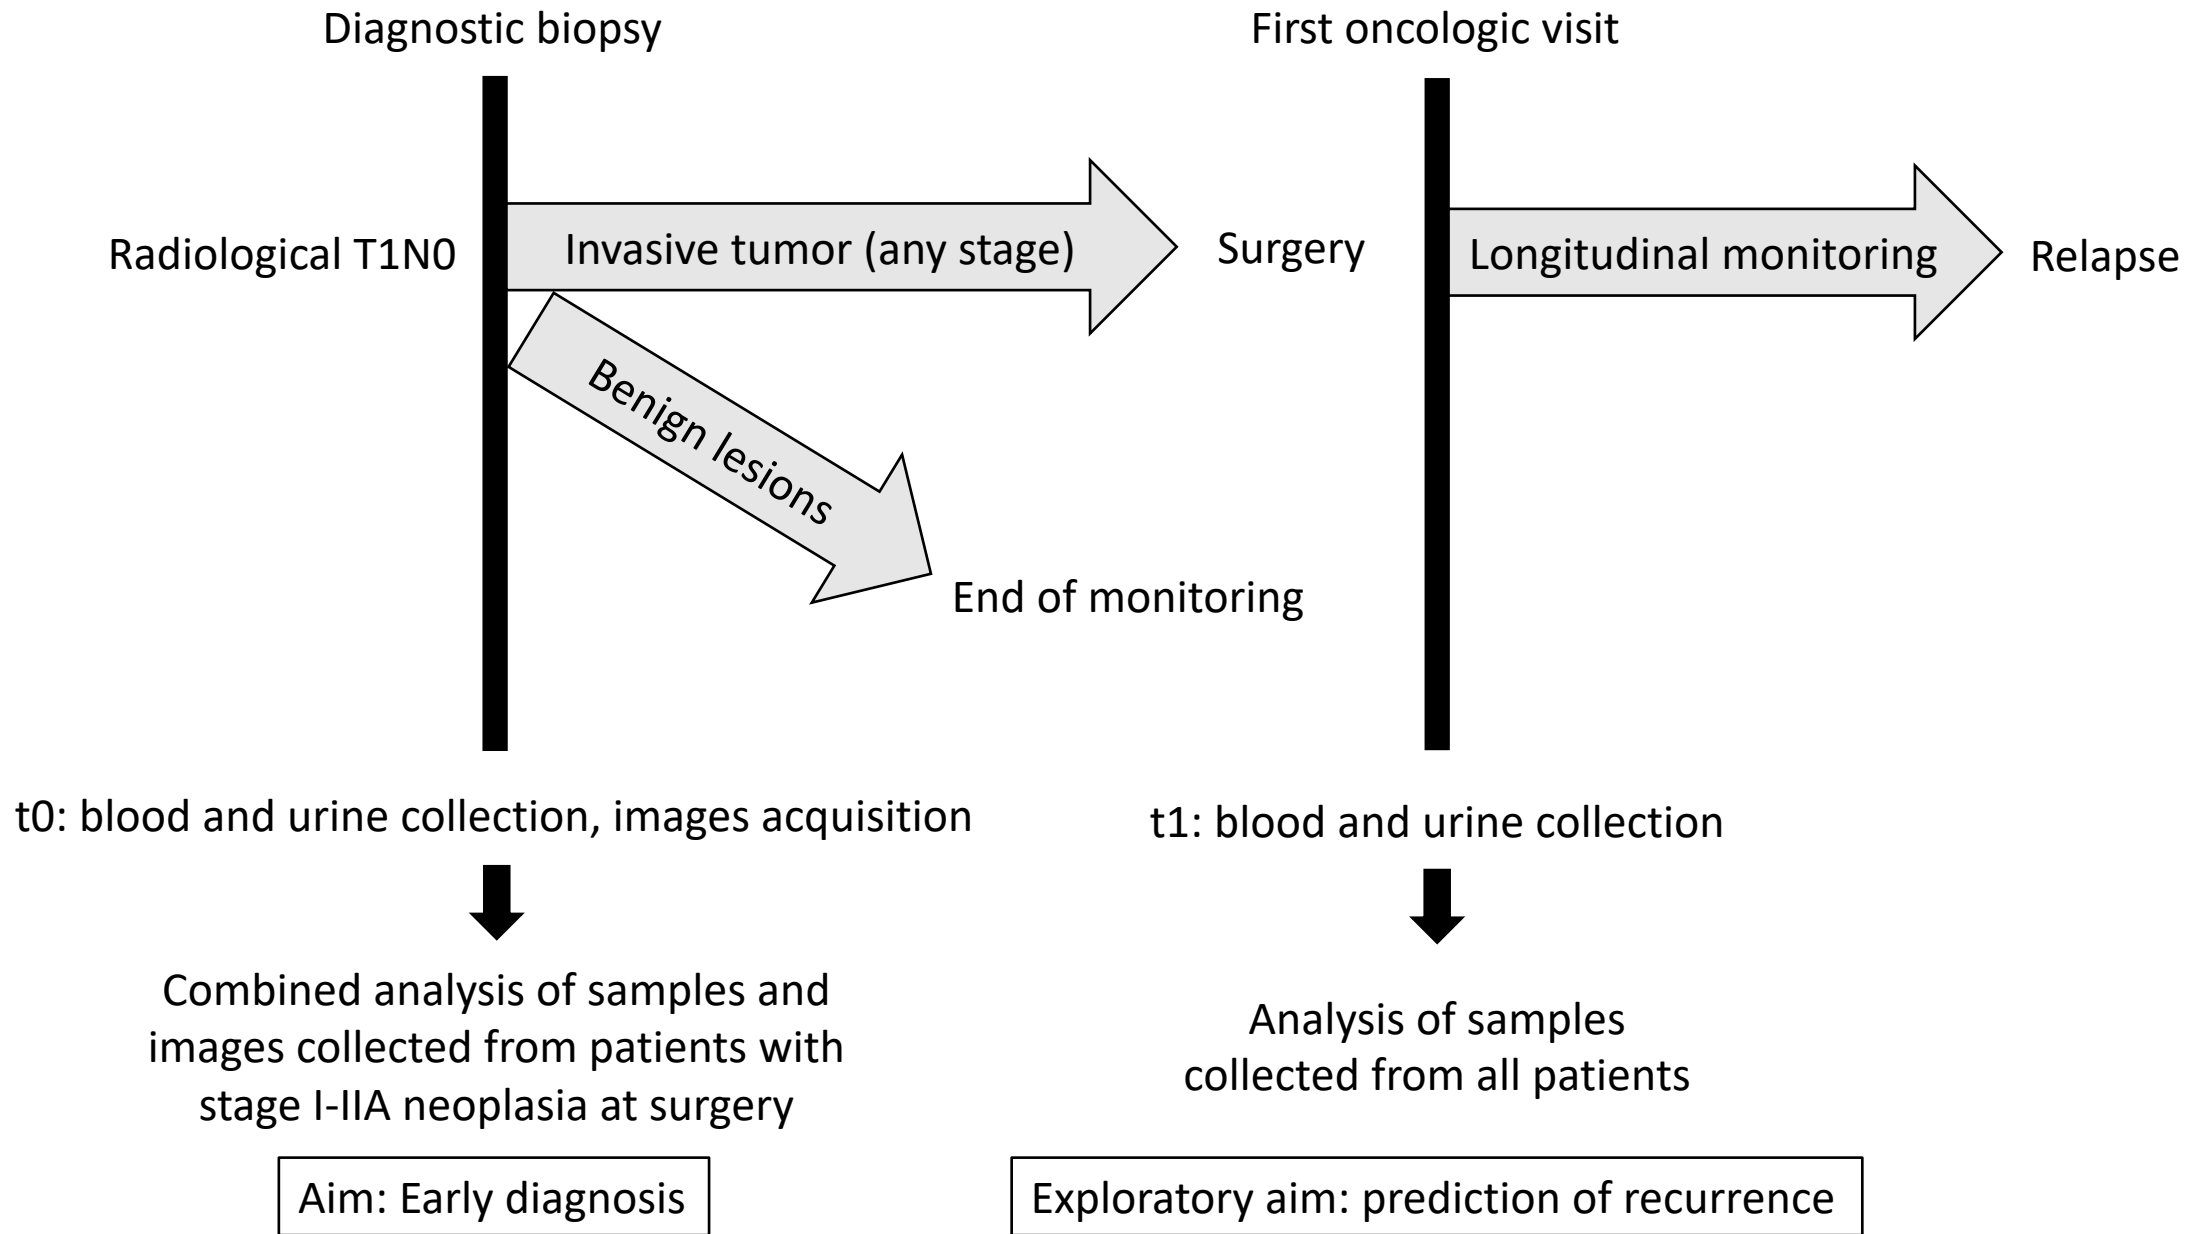

1  
2  
3  
4  
5  
6  
7  
8  
9  
10  
11  
12  
13  
14  
15  
16  
17  
18  
19  
20  
21  
22  
23  
24  
25  
26  
27  
28  
29  
30  
31  
32  
33  
34  
35  
36  
37  
38  
39  
40  
41

1  
2  
3  
4  
5  
6  
7  
8  
9  
10  
11  
12  
13  
14  
15  
16  
17  
18  
19  
20  
21  
22  
23  
24  
25  
26  
27  
28  
29  
30  
31  
32  
33  
34  
35  
36

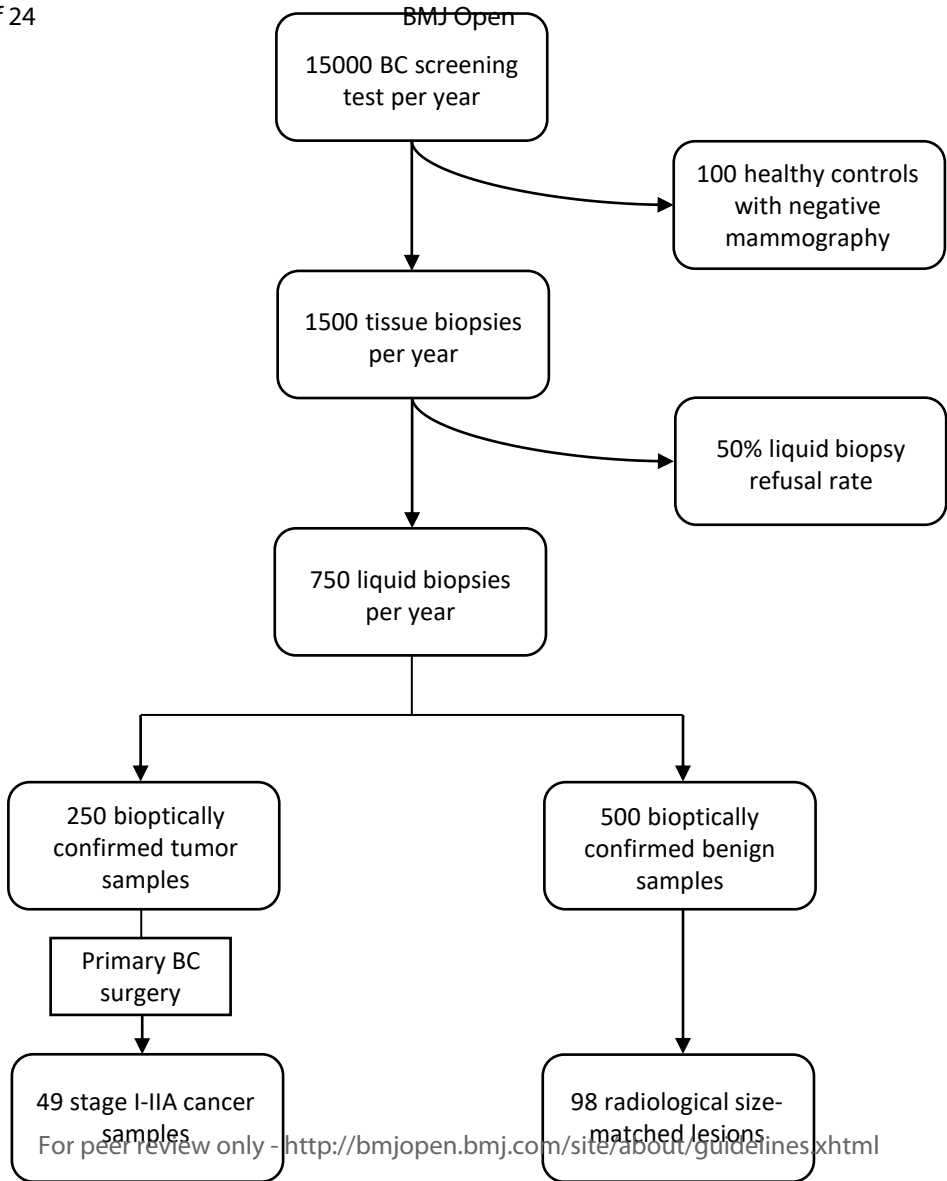

# BMJ Open

## Development of a horizontal data integration classifier for Noninvasive early diagnosis of breast cancer: the RENOVATE study protocol

|                                 |                                                                                                                                                                                                                                                                                                                                                                                                                                                                                                                                                                                                                                                                                                                                                                                                                                                                                                                                                                                                                                                                                                                                                                                                                                                                                                                                           |
|---------------------------------|-------------------------------------------------------------------------------------------------------------------------------------------------------------------------------------------------------------------------------------------------------------------------------------------------------------------------------------------------------------------------------------------------------------------------------------------------------------------------------------------------------------------------------------------------------------------------------------------------------------------------------------------------------------------------------------------------------------------------------------------------------------------------------------------------------------------------------------------------------------------------------------------------------------------------------------------------------------------------------------------------------------------------------------------------------------------------------------------------------------------------------------------------------------------------------------------------------------------------------------------------------------------------------------------------------------------------------------------|
| Journal:                        | <i>BMJ Open</i>                                                                                                                                                                                                                                                                                                                                                                                                                                                                                                                                                                                                                                                                                                                                                                                                                                                                                                                                                                                                                                                                                                                                                                                                                                                                                                                           |
| Manuscript ID                   | bmjopen-2021-054256.R1                                                                                                                                                                                                                                                                                                                                                                                                                                                                                                                                                                                                                                                                                                                                                                                                                                                                                                                                                                                                                                                                                                                                                                                                                                                                                                                    |
| Article Type:                   | Protocol                                                                                                                                                                                                                                                                                                                                                                                                                                                                                                                                                                                                                                                                                                                                                                                                                                                                                                                                                                                                                                                                                                                                                                                                                                                                                                                                  |
| Date Submitted by the Author:   | 29-Oct-2021                                                                                                                                                                                                                                                                                                                                                                                                                                                                                                                                                                                                                                                                                                                                                                                                                                                                                                                                                                                                                                                                                                                                                                                                                                                                                                                               |
| Complete List of Authors:       | <p>Ravera, Francesco; Università degli Studi di Genova, Department of internal Medicine</p> <p>Cirmena, Gabriella; Università degli Studi di Genova, Department of internal Medicine</p> <p>Dameri, Martina; Ospedale Policlinico San Martino Istituto di Ricovero e Cura a Carattere Scientifico per l'Oncologia</p> <p>Gallo, Maurizio; Università degli Studi di Genova, Department of internal Medicine</p> <p>Vellone, Valerio; Università degli Studi di Genova, Department of Surgical Sciences and Integrated Diagnostic</p> <p>Fregatti, Piero; Ospedale Policlinico San Martino Istituto di Ricovero e Cura a Carattere Scientifico per l'Oncologia</p> <p>Friedman, Daniele; Ospedale Policlinico San Martino Istituto di Ricovero e Cura a Carattere Scientifico per l'Oncologia</p> <p>Calabrese, Massimo; Ospedale Policlinico San Martino Istituto di Ricovero e Cura a Carattere Scientifico per l'Oncologia</p> <p>Ballestrero, Alberto; University of Genoa, Department of Internal Medicine</p> <p>Tagliafico, Alberto; Università degli Studi di Genova, Department of Health Sciences</p> <p>Ferrando, Lorenzo; Ospedale Policlinico San Martino Istituto di Ricovero e Cura a Carattere Scientifico per l'Oncologia</p> <p>Zoppoli, Gabriele; Università degli Studi di Genova, Department of internal Medicine</p> |
| <b>Primary Subject Heading</b>: | Oncology                                                                                                                                                                                                                                                                                                                                                                                                                                                                                                                                                                                                                                                                                                                                                                                                                                                                                                                                                                                                                                                                                                                                                                                                                                                                                                                                  |
| Secondary Subject Heading:      | Diagnostics, Radiology and imaging                                                                                                                                                                                                                                                                                                                                                                                                                                                                                                                                                                                                                                                                                                                                                                                                                                                                                                                                                                                                                                                                                                                                                                                                                                                                                                        |
| Keywords:                       | Breast tumours < ONCOLOGY, Breast imaging < RADIOLOGY & IMAGING, Health informatics < BIOTECHNOLOGY & BIOINFORMATICS, Cancer genetics < GENETICS, Adult oncology < ONCOLOGY                                                                                                                                                                                                                                                                                                                                                                                                                                                                                                                                                                                                                                                                                                                                                                                                                                                                                                                                                                                                                                                                                                                                                               |
|                                 |                                                                                                                                                                                                                                                                                                                                                                                                                                                                                                                                                                                                                                                                                                                                                                                                                                                                                                                                                                                                                                                                                                                                                                                                                                                                                                                                           |

1  
2  
3  
4  
5  
6  
7  
8  
9  
10  
11  
12  
13  
14  
15  
16  
17  
18  
19  
20  
21  
22  
23  
24  
25  
26  
27  
28  
29  
30  
31  
32  
33  
34  
35  
36  
37  
38  
39  
40  
41  
42  
43  
44  
45  
46  
47  
48  
49  
50  
51  
52  
53  
54  
55  
56  
57  
58  
59  
60

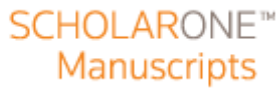

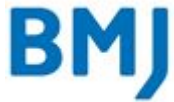

I, the Submitting Author has the right to grant and does grant on behalf of all authors of the Work (as defined in the below author licence), an exclusive licence and/or a non-exclusive licence for contributions from authors who are: i) UK Crown employees; ii) where BMJ has agreed a CC-BY licence shall apply, and/or iii) in accordance with the terms applicable for US Federal Government officers or employees acting as part of their official duties; on a worldwide, perpetual, irrevocable, royalty-free basis to BMJ Publishing Group Ltd ("BMJ") its licensees and where the relevant Journal is co-owned by BMJ to the co-owners of the Journal, to publish the Work in this journal and any other BMJ products and to exploit all rights, as set out in our [licence](#).

The Submitting Author accepts and understands that any supply made under these terms is made by BMJ to the Submitting Author unless you are acting as an employee on behalf of your employer or a postgraduate student of an affiliated institution which is paying any applicable article publishing charge ("APC") for Open Access articles. Where the Submitting Author wishes to make the Work available on an Open Access basis (and intends to pay the relevant APC), the terms of reuse of such Open Access shall be governed by a Creative Commons licence – details of these licences and which [Creative Commons](#) licence will apply to this Work are set out in our licence referred to above.

Other than as permitted in any relevant BMJ Author's Self Archiving Policies, I confirm this Work has not been accepted for publication elsewhere, is not being considered for publication elsewhere and does not duplicate material already published. I confirm all authors consent to publication of this Work and authorise the granting of this licence.

1  
2  
3 **Development of a hoRizontal data intEgration classifier for NOinvasiVe early**  
4 **diAgnosis of breasT cancEr: the RENOVATE study protocol**  
5  
6  
7  
8

9 Authors: Francesco Ravera<sup>1</sup>, Gabriella Cirmena<sup>1</sup>, Martina Dameri<sup>2</sup>, Maurizio Gallo<sup>2</sup>,  
10 Valerio Gaetano Vellone<sup>2,4</sup>, Piero Fregatti<sup>2,4</sup>, Daniele Friedman<sup>2,4</sup>, Massimo Calabrese<sup>2</sup>,  
11 Alberto Ballestrero<sup>1,2</sup> Alberto Tagliafico<sup>2,3,\*</sup>, Lorenzo Ferrando<sup>2,\*</sup>, Gabriele Zoppoli<sup>1,2\*,#</sup>  
12  
13  
14  
15  
16  
17  
18  
19

20 <sup>1</sup>Department of Internal Medicine and Medical Specialties DiMI, University of Genoa,  
21 16132, Italy  
22  
23

24 <sup>2</sup>IRCCS Ospedale Policlinico San Martino, 16132 Genoa, Italy  
25

26 <sup>3</sup>Department of Health Sciences DISSAL, University of Genoa, 16132, Italy  
27

28 <sup>4</sup>Department of Surgical Sciences and Integrated Diagnostic DISC, 16132 Genoa, Italy  
29  
30  
31  
32

33 \*These Authors equally contributed to the present manuscript  
34

35 # Correspondence should be addressed to Gabriele Zoppoli: gabriele.zoppoli@unige.it  
36  
37  
38  
39  
40

41 **Keywords:** breast cancer, early diagnosis, liquid biopsy, circulating biomarkers, radiomics  
42

43 **Word count:** 4640  
44  
45  
46  
47  
48  
49  
50  
51  
52  
53  
54  
55  
56  
57  
58  
59  
60

## Abstract

**Introduction:** Standard procedures aimed at the early diagnosis of breast cancer (BC) present suboptimal accuracy and imply the execution of invasive and sometimes unnecessary tissue biopsies. The assessment of circulating biomarkers for diagnostic purposes, together with radiomics, is of great potential in BC management.

**Methods and analysis:** This is a prospective translational study investigating the accuracy of the combined assessment of multiple circulating analytes together with radiomic variables for early BC diagnosis. Up to 750 patients will be recruited at their presentation at the Diagnostic Senology Unit of Ospedale Policlinico San Martino (Genoa, IT) for the execution of a diagnostic biopsy after the detection of a suspect breast lesion (t0). Each recruited patient will be asked to donate peripheral blood and urine before undergoing breast biopsy. Blood and urine samples will also be collected from a cohort of 100 patients with negative mammography. For cases with histological diagnosis of invasive BC, a second sample of blood and urine will be collected after breast surgery. Circulating tumor DNA, cell-free methylated DNA, and circulating proteins will be assessed in samples collected at t0 from patients with stage I-IIA BC at surgery together with those collected from patients with histologically confirmed benign lesions of similar size and from healthy controls with negative mammography. These analyses will be combined with radiomic variables extracted with freeware algorithms applied to cases and matched controls for which digital mammography is available. The overall goal of the present study is to develop a horizontal data integration classifier for the early diagnosis of BC.

**Ethics and dissemination:** This research protocol has been approved by Regione Liguria Ethics Committee (reference number: 2019/75, study ID: 4452). Patients will be required to provide written informed consent. Results will be published in international peer-reviewed scientific journals.

**Registration:** ClinicalTrials.gov, NCT04781062.



## Strengths and limitations of this study

- The study has a prospective design with well-balanced controlled cohorts
- The study assesses the performance of some of the most promising and cutting-edge biomarkers in the field of translational oncology either for diagnostic or predictive purposes in patients affected by BC
- The performance of the combination of multiple circulating biomarkers and radiomics algorithms for BC early diagnosis is assessed
- The study is the first to investigate such biomarkers in early (i.e. stage I-IIA) BC
- The study is not designed for the early diagnosis of *in situ* BCs, which are considered as benign lesions and are included in the control group

## 1. Introduction

Current protocols for the early diagnosis of breast cancer (BC) rely on the combined use of radiological procedures such as mammography and ultrasound [1,2]. Confirmation biopsy or recall tests are mandatory in case of suspect found during the first examination and bring eventually to a more definite characterization of the radiologically identified lesion. This approach is however burdened by serious issues which include (a) suboptimal sensitivity and positive predictive power respectively for radiological screening and diagnostic procedures, (b) invasiveness of biopsy with discomfort for women undergoing diagnostic tests, along with the risk of drawing non-representative portions of the suspected region considering the genotypic and phenotypic heterogeneity of BCs [3], (c) long turnaround time for recall tests, even in high-level centers. In particular, the suboptimal sensitivity of screening procedures leads to non-diagnosed tumors which become able to advance locally and spread systemically, impacting patients' prognosis, while the suboptimal positive predictive power of diagnostic evaluation implies unnecessary invasive biopsies [1].

1  
2  
3 The compelling necessity of increasing the accuracy of screening and diagnostic procedures  
4 for cancer has brought to a relevant advancement in the pursuit of accurate biomarkers able  
5 to efficiently detect and characterize it. To date, however, no protocol with effective and  
6 recognized clinical validity for the early diagnosis of BC has been developed.  
7  
8  
9

10  
11 Amongst the most promising biomarkers, circulating tumor DNA (ctDNA) and cell-free  
12 methylated DNA (cfMeDNA), exosomes, and microRNA (miRNA) have been the subject of  
13 relevant scientific reports [4–9]. Moreover, machine-learning (so called “deep learning”)  
14 algorithms have been applied to traditional radiology imaging techniques for diagnosis  
15 assistance with exciting results in the field of radiomics [10]. Results in the proteomics field  
16 have instead been few, in part due to the cumbersome methodologies often applied to the  
17 study of these molecules [11].  
18  
19  
20  
21  
22  
23  
24  
25

26 Since it is hardly conceivable that a single biomarker is able to achieve 100% accuracy in the  
27 early detection of BC, the primary aim of the present study is to merge for this purpose the  
28 assessment of multiple biological analytes with the refinement of radiomics algorithms,  
29 overcoming the aforementioned limitations in terms of accuracy of the individual biomarkers.  
30 The concept of combining different data layers to reach a better classifier compared to the  
31 individual analytes is referred to as horizontal data integration (HDI) classification. Therefore,  
32 the overall goal of the project is to develop an HDI classifier enabling early noninvasive  
33 diagnosis of BC with similar accuracy compared to breast biopsies.  
34  
35  
36  
37  
38  
39  
40  
41  
42  
43  
44

## 45 **2. Methods and analysis**

### 46 **2.1. Study design**

47 This is a prospective translational case-control study with the primary aim of assessing the  
48 clinical validity of several biomarkers, individually and combined, in the early detection of BC  
49 in a real-life clinical setting (see Figure 1 for study diagram). Patients are recruited at the  
50 presentation to the Diagnostic Senology Unit of Ospedale Policlinico San Martino (Genoa,  
51 Italy) for the execution of the breast biopsy after the radiological detection of a suspect breast  
52 lesion  $\leq 2$  cm (i.e. radiological T1, BIRADS-3/4/5) with no radiological evidence of axillary or  
53  
54  
55  
56  
57  
58  
59  
60

1  
2  
3 distant disease. These patients are asked, upon completion of an informed written consent, to  
4 donate four peripheral blood tubes (30 mL total) and one urine sample (40 mL). Of these, only  
5 samples collected from patients with stage I-IIA neoplasia at surgery (T1N0 or T2N0 or T1N1a)  
6 or histologically confirmed benign lesions will be analysed. A second sample is obtained from  
7 those patients with confirmed histological diagnosis of invasive BC at the first oncologic visit  
8 after breast primary surgery (t1) according to normal practice, independently from possible  
9 neoadjuvant treatments. No limitations based on tumor stage will be made for the analysis of  
10 the latter. Blood and urine samples are also collected and analysed from a cohort of 100  
11 healthy women with two consecutive negative mammograms (BIRADS-1 or BIRADS-0 with  
12 negative ecography) as well.

13  
14 All patients are screened with the following inclusion and exclusion criteria. Inclusion criteria  
15 include: written informed consent; breast lesions detected by digital bilateral mammography;  
16 age  $\geq 18$  years and  $\leq 75$  years; eligibility for diagnostic biopsy (tru-cut or Vacuum Assisted  
17 Breast Biopsy) as per normal clinical practice for study population, or absence of breast  
18 lesions at the digital mammography for healthy controls (BIRADS-1 or BIRADS-0 with negative  
19 ultrasound); ability and willfulness to comply with the protocol requirements.

20  
21 Exclusion criteria include: previous history of invasive cancer, any type; clinical or radiological  
22 suspicion of advanced or metastatic cancer at the time of screening; known history of active  
23 or treated autoimmune or manifest chronic or seasonal and active allergic disorders (with the  
24 exception of autoimmune thyroiditis); history of major trauma or surgery during the 24 weeks  
25 before screening; history of active infectious disease, either chronic or acute occurring during  
26 the 8 weeks before screening; history of known acute or chronic cardiac, kidney, or liver  
27 disease disorders or acute cardiac events.

## 2.2. Candidate biomarkers

### 2.2.1. Circulating tumor DNA and cell-free Methylated DNA

28  
29 ctDNA obtained via liquid biopsy has shown serious potential not only in the early diagnosis  
30 of cancer but *inter alia* as an effective marker for its recurrence, longitudinal monitoring and  
31 response to therapy [12]. Current methods for detecting ctDNA however are mostly based on  
32  
33  
34  
35  
36  
37  
38  
39  
40  
41  
42  
43  
44  
45  
46  
47  
48  
49  
50  
51  
52  
53  
54  
55  
56  
57  
58  
59  
60

1  
2  
3 sequencing somatic mutations from cell-free DNA (cfDNA), a process constrained by relevant  
4 limitations in clinical applicability due to (a) expectable low sensitivity in early stage cancers  
5 given the limited number of recurrent mutations in ctDNA [8,13], (b) the vast heterogeneity of  
6 DNA mutations occurring in a single tumor together with nonspecific mutations profiles along  
7 different patients and cancer types [12,13], (c) current cost-prohibitive impact of cfDNA Next  
8 Generation Sequencing (NGS) for mutation assessment [14]. On the other hand, the  
9 assessment of cfMeDNA may overcome the limitations outlined above. DNA methylation is  
10 commonly involved in cellular development, tissue-specific gene expression, and regulation  
11 of imprinted alleles, with widespread effects on cellular growth and genomic stability [15].  
12 Changes in methylomes in cancer are usually associated with alterations of the transcriptional  
13 outcome and genomic instability, priming or enhancing carcinogenesis. Given the impact of  
14 methylation changes on cellular equilibrium, different methylomes may be associated with  
15 specific biological features providing useful information for the early diagnosis of cancer [16].  
16 Shen *et al.* recently developed a sensitive, immunoprecipitation-based protocol to analyze the  
17 methylomes of small quantities of cfDNA, providing an efficient method to detect large-scale  
18 DNA methylation changes that are enriched for tumor-specific patterns [8]. cfMeDNA  
19 immunoprecipitation and high-throughput sequencing (cfMeDIP-seq) was able to find cancer-  
20 derived DNA methylation events in cfDNA and to distinguish multiple cancer types from  
21 healthy controls, besides effectively discriminating different methylation patterns across  
22 diverse cancers.

### 23 24 25 **2.2.2. RNA-based biomarkers**

26 RNA-based biomarkers can be referred either to coding or non-coding RNAs. Non-coding  
27 RNAs, including miRNAs and long non coding RNAs, have been extensively studied over the  
28 last years as promising markers for cancer early diagnosis and monitoring, being of particular  
29 interest for their stability and quantity in the bloodstream [17]. On the other hand, coding-RNAs  
30 include the cell-free messenger RNA, whose evaluation may allow the non-invasive  
31 assessment of the whole-body transcriptome [18] with relevant implications for several clinical  
32 purposes.

### 2.2.3. Circulating proteins

Proteomic analyses in neoplastic patients have been evaluated in regard to diverse clinical purposes with suboptimal results, given the challenging characterization of circulating proteins. The assessment of alterations in protein-mediated signaling networks is of great interest for its possible implications in the early diagnosis and monitoring of cancer, besides the detection of potentially actionable targets for therapeutic purposes [11].

## 2.3. Sample collection

### 2.3.1. Peripheral blood and urine collection, processing and storage

One investigator, a research nurse, and two biologists are collaborating in the first eighteen months of the project to collect at t0 and t1 two PAXgene® Blood ccfDNA Tubes CE-IVD (PreAnalytix, GmbH), one BD Vacutainer® K2E (EDTA) Plus Blood Collection Tube CE-IVD (BD life Sciences), one Tempus TM Blood RNA tube (Applied Biosystems), and one urine specimen in a sterile container. Blood samples are processed to extract and store cfDNA from plasma, and to collect proteins, exosomes, PBMCs, and total RNA. PAXgene tubes are first centrifuged for 15 minutes at 1900 rcf at room temperature (RT), then the collected plasma is further centrifuged for 10 minutes at 1900 rcf at RT. EDTA tubes are centrifuged for 15 minutes at 1600 rcf at RT and the collected plasma is further centrifuged at 1900 rcf for 10 minutes at RT. Plasma is then aliquoted in cryovials. Tempus tubes for total RNA extraction are immediately stored at -80°C. At the moment of collection, urine is mixed with Cell-Free DNA Urine Preserve (Streck) in order to stabilize cfDNA in samples for up to 7 days at a temperature ranging from 6 °C to 37 °C. Urine is centrifuged at 2680 rcf for 10 minutes, and the supernatant is aliquoted into 15 mL tubes and stored at -80°C until cfDNA extraction. Samples are stored at -80°C in a dedicated, Eppendorf CryoCube F740hi ULT Freezer, 3 Compartments.

All test tubes, from blood collection to storage, are barcoded to increase traceability and anonymity to external personnel.

### 2.3.2. Resources

A 150 sqm fully equipped laboratory supports the pivotal work on the samples collected for our project. All procedures of platelet separation and plasma processing, cfDNA and RNA

1  
2  
3 extraction, quality control, amplification, library preparation and sequencing happen in  
4 separate, clean environments optimized for such tasks. Every operation, from sample  
5 processing, to nucleic acid extraction and sequencing, is semi-automated in order to minimize  
6 cross-sample contamination and ensure optimal reproducibility and consistency of operations.  
7  
8 A dedicated freezer is available in the laboratories for sample storage. The laboratory is  
9 equipped with a ThermoFisher Scientific Ion™ S5 XL sequencer. Data collection and the dry-  
10 lab part of the analyses are performed on high performance workstations maintained in high-  
11 security, dedicated environments to avoid the risk of data loss and sensible data cyber-theft.  
12  
13  
14  
15  
16  
17  
18  
19

## 20 **2.4. Analysis and integration of circulating biomarkers with radiomics**

### 21 **2.4.1. Ultrasensitive NGS on ctDNA**

22 We designed a tagged-amplicon NGS panel covering 101 short regions of frequently mutated  
23 genes in BC. For this task, we analyzed the GENIE dataset v3.0 [19], which includes 3,269  
24 sequenced primary and metastatic BC. This dataset was chosen for its size and homogeneity.  
25 Since our purpose was looking at the most frequent, non-overlapping (i.e. mutually exclusive)  
26 mutations, the sample size of GENIE was deemed as adequate for the panel design. Amongst  
27 the most common cancer genes in BC, very few behave as dominant oncogenes (i.e. with  
28 frequent mutation in limited regions of the gene, like PIK3CA), whereas several behave as  
29 tumor suppressors (i.e., with rare mutations occurring along the whole gene, like CDH1). By  
30 dividing all the genes sequenced by GENIE into 9,603 regions shorter than 50 base pairs, we  
31 realized that to detect at least one mutation, we would need to sequence only 101 regions to  
32 cover 80% of the whole GENIE dataset, but 420 regions to increase such detection rate to  
33 88%. In particular, amplicons covering TP53 (30 exonic regions), CDH1 (50 exonic regions),  
34 GATA3 (13 exonic regions), and PIK3CA (7 exonic regions) would optimize the coverage by  
35 minimizing the size of our panel. TP53 is planned to be analyzed, together with CDH1, for all  
36 its exons. On the other hand, PIK3CA presents mostly hotspot mutations in exons 9 and 20.  
37 Hence, only those two exons are going to be covered by this design. The 101 selected regions  
38 will be assessed in plasma ctDNA using a custom design, which leverages the novel,  
39 proprietary tagged-amplicon OncoMine™ cfDNA methodology by ThermoFisher Scientific Inc.  
40  
41  
42  
43  
44  
45  
46  
47  
48  
49  
50  
51  
52  
53  
54  
55  
56  
57  
58  
59  
60

1  
2  
3 Its use allows for a limit of detection of 0.1% at 20,000x sequencing coverage with 20 ng of  
4 circulating DNA, well attainable with two peripheral blood samples collected in PAXgene  
5 tubes. ThermoFisher defines ctDNA positivity as the detection of three molecular families.  
6  
7 However, this threshold is arbitrary and will be adapted depending on the actual class the  
8 samples fall in, in order to optimize the accuracy of the multiomic HDI. cfDNA extraction is  
9 performed by using the QIAamp Mini Elute cfDNA Mini or Midi Kit (Qiagen, Hilden, Germany)  
10 on the Qiacube system, according to the Manufacturer's instructions. cfDNA is extracted from  
11 at least 4 mL of plasma collected in the EDTA tubes and 2 mL of plasma collected in the  
12 PAXgene tubes, managing to obtain the requested amount of cfDNA for cfMeDIP-seq (~ 5 ng)  
13 and the assessment of ctDNA mutations (~15 ng). cfDNA is processed on an Ion Chef™ fluidic  
14 handler, and sequenced using the tagged-amplicon methodology with our custom-design  
15 panel using as per manufacturer's specifications on a Ion S5™ sequencer. Tertiary analysis  
16 will be performed on a dedicated Ion Server System available in our laboratory. The library  
17 size of our custom panel is half of the commercial ThermoFisher Scientific Ion Torrent™  
18 OncoMine™ Comprehensive cfDNA™ panel, from which the aforementioned performance  
19 considerations have been derived. Hence, the use of our custom-design panel appears  
20 feasible and should perform better in light of its smaller size and subsequent deeper attainable  
21 sequencing coverage.  
22  
23  
24  
25  
26  
27  
28  
29  
30  
31  
32  
33  
34  
35  
36  
37  
38  
39

#### 40 **2.4.2. Methylome profiling of cfDNA**

41  
42 Recent works pointed out encouraging results in terms of accuracy of cfMeDIP-seq in the  
43 detection of informative methylation changes of small quantities (1-10 ng) of plasma cfDNA  
44 for the diagnosis of renal cell carcinoma and intracranial tumors [20,21], with the former being  
45 effectively detected also by cfMeDIP-seq on urinary cfDNA. According to the protocol  
46 elaborated by Shen *et al.*, cfMeDIP involves four steps: 1) cfDNA end repair, A-tailing and  
47 adapter ligation; 2) cfMeDIP immunoprecipitation and enrichment using an antibody targeting  
48 5 methylcytosine; 3) library preparation; 4) high throughput NGS on an Illumina platform for  
49 cfMeDNA data [22]. This approach based on immunoprecipitation allows to avoid cfDNA  
50  
51  
52  
53  
54  
55  
56  
57  
58  
59  
60

1  
2  
3 bisulfite treatment, typically used to study DNA methylation but burdened by the high rate of  
4 DNA degradation during the process.  
5  
6

### 7 **2.4.3. Proteomics analysis**

9 The proposed task is based on the relative quantification of blood proteins by a novel, highly  
10 multiplexed proteomic assay (SomaScan™) [23,24]. SomaScan™ (SomaLogic™) is  
11 considered the most comprehensive protein array available so far for the relative quantification  
12 of proteins. Over 7,500 proteins can be simultaneously analyzed starting from 55 µL of plasma.  
13 This technology involves a new type of aptamers, which are single stranded DNA molecules  
14 able to bind proteins, called SOMAmers. In addition to their high affinity for individual proteins,  
15 SOMAmers have a unique 40-nucleotide sequence tag and a fluorescent label that allows  
16 their identification and quantification in high-density microarrays. SOMAmers have been  
17 successfully assembled in a commercial product allowing the comparative evaluation of  
18 proteins in as low as 55µl of serum or plasma (or other biological fluids). The SOMAscan™  
19 assay is a highly multiplexed, sensitive, quantitative, and reproducible proteomic tool for  
20 biomarker discovery and development. SomaScan™ can detect proteins within a range of 10  
21 logarithms, allowing for an unmatched sensitivity to detect even femtomolar protein  
22 concentrations. The analysis of the SomaScan™ is performed using classic DNA array data  
23 analysis and is based on bioinformatics tools that have been developed for gene array  
24 analysis.  
25  
26  
27  
28  
29  
30  
31  
32  
33  
34  
35  
36  
37  
38  
39  
40  
41  
42

### 43 **2.4.4. Radiomics analyses**

45 A preliminary radiomics classifier has been developed by the Diagnostics Senology team of  
46 Ospedale Policlinico San Martino, based on digital breast tomosynthesis (DBT) images of  
47 consecutive participants from the ASTOUND trial [2]. Radiomics analyses were performed on  
48 all DBT images within manually selected regions of interest (ROIs) including all the dense  
49 parts of the breast and excluding the fatty parts. ROIs were selected by a single radiologist,  
50 with proven expertise in quantitative image analysis. Descriptors of the preliminary classifier  
51 were selected after initial screening of 104 radiomics features to reduce the risk of over-fitting  
52 and according to features previously used to associate breast parenchymal patterns with  
53  
54  
55  
56  
57  
58  
59  
60



1  
2  
3 cancer risk [25]. For the present project, image features will be extracted from the same cases  
4 and matched controls for whom NGS and proteomics analyses are performed, using an open  
5 source software platform for medical image informatics, and will make use of advanced deep  
6 learning methodologies.  
7  
8  
9

#### 10 11 **2.4.5. HDI classifier**

12 Sensitivity and specificity of ctDNA analysis, cfMeDNA tests, proteomic analysis, and  
13 radiomics for the early detection of BC will be assessed. Data from these classifiers will be  
14 subsequently processed and used to generate the HDI model, based on the ensemble  
15 learning approach methodology. Ensemble learning combines predictions of multiple  
16 individual classifiers obtained by different techniques such as random forest, support vector  
17 machine or general linear modeling in order to enhance generalization power [26], avoid  
18 overfitting, and increase the strength and reliability of the final outcome [27]. Specifically, the  
19 outcomes from ctDNA, cfMeDNA, proteomics and radiomics tests will be combined by using  
20 a weighted-majority voting approach implemented in the R environment (caret package). We  
21 do not envisage RNA-based classifiers to be initially included in our multianalyte model.  
22  
23  
24  
25  
26  
27  
28  
29  
30  
31  
32  
33

#### 34 **2.4.6. Experimental validation and other analyses**

35 Upon completion of these experiments, we will seek to validate the possible discovery of novel  
36 biomarkers and to facilitate their transfer to clinical applicability. Other promising noninvasive  
37 biomarkers will be studied, thanks to the unique sample set at our disposal. We foresee the  
38 possibility to perform exosome-enriched miRNA sequencing, PBMC transcriptome  
39 sequencing by using the Ampliseq™ Transcriptome solution on our Ion S5™ XL sequencer.  
40 Eventually, such analyses may be integrated into the HDI classifier to augment the accuracy  
41 of BC early diagnosis.  
42  
43  
44  
45  
46  
47  
48  
49  
50

#### 51 **2.5. Study outcomes**

52 This study aims at assessing the performance of multiple analytes, individually and combined  
53 in a HDI classifier, in the early detection of BC. The primary outcome is defined upon the  
54 histopathological diagnosis of early invasive BC characterized as per SIAPEC/ASCO/CAP  
55 criteria, with radiological extension  $\leq$  2 cm (radiological T1) and stage I-IIA at surgery (T1N0  
56  
57  
58  
59  
60

1  
2  
3 or T2N0 or T1N1a). Benign lesions are defined upon the detection of radiological lesions  $\leq 2$   
4 cm without the presence of invasive neoplasia at the first biopsy and at surgery, if performed.  
5  
6  
7 *In situ* tumors are included in the latter group.  
8

## 9 **2.6. Clinical data**

10  
11 Electronic case report forms have been designed for the annotation of patients' clinical data.  
12  
13 These include study participants' demographics, biometric parameters such as height, weight  
14 and BMI, assumption of alcohol and smoke, information about the endocrine status (pre- or  
15 post-menopause, age at menarche, assumption of endocrine therapy, number of  
16 pregnancies), familiarity for BC and predisposing mutations, comorbidities. Items included in  
17 the eCRF are provided in **Tab. 1**. Tumor histology and immunohistochemical features will be  
18 annotated as well.  
19  
20  
21  
22  
23  
24  
25

## 26 **2.7. Data security and confidentiality**

27  
28 Patients' pseudo-anonymized radiological images as well as demographic and  
29 anatomopathological data are collected according to the local ethics committee guidelines  
30 using a dedicated, state-of-the-art firewalled data collection system, OpenClinica®, hosted by  
31 University of Genova servers.  
32  
33  
34  
35

## 36 **2.8. Statistical analysis**

### 37 **2.8.1. Projected sample size**

38  
39 The Diagnostics Senology Unit of San Martino Hospital is the highest-level referral center in  
40 Italy for a population basin of more than 2,000,000 people. In a single year, approximately  
41 15,000 mammograms are performed (Figure 2). Of these, 1,500 yield a radiologic suspicion  
42 of malignancy with an ensuing biopsy. Assuming a 50% refusal rate by our patients to undergo  
43 trial-specific blood collection, we foresee to enroll 750 patients with radiologically suspect  
44 small breast lesions. Among these patients, we assume diagnosis of invasive BC will be  
45 confirmed in one third. Of these 250 bioptic diagnoses of BC, which will undergo primary  
46 surgery, as per internal historical records, 40% are assumed to be pT1 and 60% higher than  
47 pT1. Assuming another 10% failure rate in sample processing and storage, we will have the  
48 potential to collect imaging data and samples from approximately 90 patients with pT1 BC and  
49  
50  
51  
52  
53  
54  
55  
56  
57  
58  
59  
60

1  
2  
3 180 radiological size-matched lesions in a single year (Figure 2). Patient enrollment is  
4 projected in a time frame of 12 months from the beginning of the study, whereas samples  
5 collection at t1 is expected to end approximately 6 months after the enrollment of the last  
6 patient.  
7  
8  
9

### 10 11 **2.8.2. Sample size calculation**

12 The sample size required for our analyses is  $N = 147$ , with 49 biopsy-proven stage I-IIA BC  
13 cases and 98 biopsy-proven benign lesions of similar radiological size. In particular, assuming  
14 that the best non-HDI classifier is, in the end, the one with the highest number of tested  
15 variables (worst-case scenario, e.g., transcriptome sequencing on platelets with  
16 approximately 20,000 transcripts analyzed), we would need [28,29]:

- 17 -  $N = 87$  samples for a training set, in a 1:2 ratio between histologically proven BCs and  
18 benign lesions matched for radiological size, with a standardized fold change of 1.2,  $n \sim 20,000$   
19 features to be assessed, tolerance = 0.05 from the best possible classifier, as defined by  
20 Dobbin *et al.* [29];
- 21 -  $N = 26$  samples for a testing set (70/30 split of samples between training and testing set)  
22 with similar ratio of cases and controls;
- 23 -  $N = 34$  samples for a validation set (30% of the sum of training and testing sets).

24 It may be possible that, adopting HDI classification, the actual needed sample size will be  
25 smaller than calculated. At present however, we are not aware of well-established statistical  
26 approaches to obtain a more robust estimation of the number needed for our experiments  
27 other than the one we adopted.  
28  
29

## 30 31 **2.9. Amendments**

32 The original protocol for this study underwent three amendments, mainly aimed at including  
33 the assessment of urinary biomarkers and expanding the cohort of analysed patients.  
34  
35

### 36 37 **2.9.1. Amendment #1: collection and analysis of urine samples**

38 The first amendment to this protocol, presented on February 18th 2020, involved the collection  
39 and analysis of urine samples in addition to blood samples, which was not included in the  
40 original version. An efficient method for the early diagnosis of BC based on the assessment  
41  
42  
43  
44  
45  
46  
47  
48  
49  
50  
51  
52  
53  
54  
55  
56  
57  
58  
59  
60

1  
2  
3 of urinary biomarkers would substantially eliminate the invasiveness of the overall procedure,  
4 possibly facilitating the execution of large-scale screening campaigns.

### 7 **2.9.2. Amendment #2: healthy controls**

9 The second amendment, presented on February 4th 2021, involved the recruitment and  
10 analysis of a cohort of 100 healthy women with negative mammography (BIRADS-1 or  
11 BIRADS-0 with adjunct negative ultrasound) as a healthy control group, in addition to patients  
12 undergoing breast biopsy. As the presence of benign breast lesions may determine possible  
13 variations in blood and urinary analytes, especially in case of *in situ* tumors, the purpose of  
14 the present amendment is to possibly categorize patients upon the presence or absence of  
15 non-malignant breast lesions, enhancing the accuracy of the HDI classifier.  
16  
17  
18  
19  
20  
21  
22  
23

### 24 **2.9.3. Amendment #3: redefinition of the study cohort**

26 The third and final amendment, presented on May 27th 2021, involved several points.  
27 According to the original protocol, concerning the cohort of patients with histological diagnosis  
28 of invasive BC, only samples collected at t0 from patients with T1N0 tumor at surgery would  
29 have been analysed. Moreover, the collection and analysis of t1 samples would have involved  
30 only this group of patients, with the exclusive aim of distinguishing between tumor- and host-  
31 specific molecular alterations in connection with the presence/absence of BC. With the present  
32 amendment, samples collected at t0 will be analysed from patients assessed as with stage I-  
33 IIA tumor at surgery (T1N0 or T2N0 or T1N1a), allowing an effective expansion of the sample  
34 size, while remaining in the setting of early stage BC. Furthermore, the collection and analysis  
35 of t1 samples will include all patients diagnosed as with invasive BC and sampled at t1, without  
36 limitations in terms of tumor stage assessed at surgery. The analysis of t1 samples, coupled  
37 with patients' longitudinal monitoring performed as per normal clinical practice, will allow the  
38 assessment of the accuracy of a multi-analyte evaluation for the prediction of BC recurrence,  
39 added as exploratory aim of the present study.  
40  
41  
42  
43  
44  
45  
46  
47  
48  
49  
50  
51  
52  
53  
54

### 55 **2.10. Study current status**

57 The recruitment phase of the research project started on January 18<sup>th</sup> 2021. To date (October  
58 21<sup>st</sup> 2021), 183 patients undergoing diagnostic biopsy were recruited. Of these, 98 presented  
59  
60

1  
2  
3 a benign lesion, while 51 presented a malignant lesion. Thirty-four patients were ruled out. Of  
4 the recruited patients with the histological diagnosis of BC, 35 underwent breast surgery. Of  
5 these, 23 patients had a stage I-IIA breast tumor. One hundred and ten patients with negative  
6 mammography were recruited as healthy controls. Of these, 20 patients were ruled out. The  
7 recruitment phase of the study will end by March 2022. Proteomics, ctDNA, and cfMeDIP-seq  
8 experiments will be performed during the second year of the research project. The third year  
9 of the research project will be dedicated to assess the performance of the individual classifiers,  
10 including the one based on radiomics. During the fourth year we will proceed to the wet lab  
11 validation, besides performing the transcriptomic experiments. The fifth and final year of the  
12 research project will be dedicated to build and optimize the HDI classifier.

### 2.11. Patient and Public Involvement

There was no patient or public involvement in the design of this study.

### 3. Ethics and dissemination

Written informed consents are obtained from each study participant. Participant information sheet includes the main information of the study protocol, the known side effects and any risk implied in the participation to the study, beside the contact information of study investigators. All data are deidentified and no patient-related information will be revealed during analysis. The Regione Liguria Ethics Committee c/o Ospedale Policlinico San Martino has approved the study (reference number: 2019/75, study ID: 4452).

All information concerning patients included in this study are covered by strict confidentiality in compliance with the General Data Protection Regulation EU 2016/679 (GDPR) and D.lgs. 30.06.2003, n. 196, as modified from D.lgs. 10.08.2018, n. 101. The study is conducted in accordance with the national law and according to international guidelines for the conduction of clinical trials referred to as "Good Clinical Practice".

Results will be published in international peer-reviewed scientific journals.

### 4. DISCUSSION

1  
2  
3 The assessment of circulating biomarkers for clinical purposes is currently burdened by  
4 several issues, including suboptimal accuracy and the lack of standardized pre-analytical and  
5 analytical procedures. Overcoming these limitations would allow the achievement of minimally  
6  
7  
8  
9  
10  
11  
12  
13  
14  
15  
16  
17  
18  
19  
20  
21  
22  
23  
24  
25  
26  
27  
28  
29  
30  
31  
32  
33  
34  
35  
36  
37  
38  
39  
40  
41  
42  
43  
44  
45  
46  
47  
48  
49  
50  
51  
52  
53  
54  
55  
56  
57  
58  
59  
60

The assessment of circulating biomarkers for clinical purposes is currently burdened by several issues, including suboptimal accuracy and the lack of standardized pre-analytical and analytical procedures. Overcoming these limitations would allow the achievement of minimally invasive and personalized assays for the management of neoplastic patients, either in the diagnostic setting or in the early detection of recurrence or the prediction of the response to therapy, possibly replacing or implementing current protocols based on radiology and traditional tissue biopsies. One of the most effective strategies carried out to enhance the accuracy of liquid biopsies is the contemporary assessment of multiple analytes, which has already shown augmented sensitivity and specificity compared to the evaluation of the individual biomarkers [30]. Such implementation can occur at different levels of complexity, involving different kinds of integration. A basic integration can be referred to the combination of biomarkers of the same kind, such as DNA-DNA or protein-protein combinations. On the other hand, an advanced integration refers to the combined assessment of different kinds of analytes, such as DNA-protein, or the combination of circulating biomarkers with radiological procedures possibly refined with radiomics [30].

The purpose of this study is to evaluate the performance of the combination of multiple circulating biomarkers, either plasmatic or urinary, and radiomics for BC early diagnosis in patients recruited from a real-life clinical setting. At the enrollment, patients undergo a rigorous selection in order to avoid possible confounding factors that can affect the assessment of tumor-specific cfMeDNA, circulating RNA, and proteins. Only samples collected from patients presenting an early-stage disease (I and IIA) at diagnosis will be analysed for this aim. This selection allows us to assess the effective potential of current techniques for the evaluation of circulating biomarkers in the early diagnosis of the most common cancer worldwide. Conversely, there will be no limits based on tumor stage for the analysis of circulating biomarkers collected after surgery, this being aimed at the prediction of BC recurrence. This study is not designed for the detection of *in situ* BCs, which are considered as benign lesions and will be included in the control group. This represents indeed the main limitation of

1  
2  
3 this protocol, given the typical transition of *in situ* BC to invasive cancer and the consequent  
4 necessity of its early detection and eradication.  
5

6  
7 However, the protocol outlined above presents relevant advantages compared to other studies  
8 aimed at the same purpose, including the application of recent and cutting-edge techniques  
9 to a selected but realistic cohort of patients, possibly bringing to effective advancements in  
10 current standards BC patients management, besides directing future researches in the  
11 panorama of translational medicine applied to oncology.  
12  
13  
14  
15  
16

17  
18  
19  
20 **Author statement.** GZ conceived the study. FR wrote the manuscript. GC and MD provided  
21 a significant contribution in the section “Methods and analysis” . MG, VGV, PF, DF, MC, AB,  
22 AT, and LF critically reviewed the manuscript draft.  
23  
24

25  
26 **Funding statement.** This trial is entirely supported by a Fondazione AIRC per la Ricerca sul  
27 Cancro, Investigator Grant ID 21761 to Gabriele Zoppoli.  
28  
29

30 **Competing interests.** The authors declare no conflict of interest for the present study.  
31  
32  
33  
34  
35  
36

### 37 **Figure legends**

38  
39 **Figure 1. Study diagram.** Blood and urine samples will be collected from patients yielding a  
40 radiological breast lesion  $\leq 2$  cm with no evidence of lymph node dissemination (radiological  
41 T1N0). Images and samples acquired from patients with stage I-IIA (T1N0 or T2N0 or T1N1a  
42 neoplasia) BC at surgery will be analysed for diagnostic purposes together with images and  
43 samples acquired from patients yielding benign breast lesions and from patients with negative  
44 mammography. Blood and urine samples will be re-collected from all patients yielding invasive  
45 neoplasia at diagnosis after surgery at the first oncologic visit, and will be analysed for the  
46 prediction of BC recurrence.  
47  
48  
49  
50  
51  
52  
53  
54

55  
56  
57  
58 **Figure 2. Sample size diagram.** Approximately 1,500 breast biopsies per year are performed  
59 at the Diagnostics Senology Unit of San Martino Hospital. Of a projected number of 750 liquid  
60

1  
2  
3 biopsies, we foresee to collect samples and acquire mammograms from at least 49 patients  
4 with stage I-IIA BC, and 98 patients with radiological size-matched lesions, along with those  
5 samples and images acquired from 100 healthy women with two consecutive negative  
6 mammograms.  
7  
8  
9  
10  
11  
12  
13

| 14 Biometrics | 15 Voluptuous habits                                       | 16 Endocrine status                                         | 17 Predisposition                                                      | 18 Comorbidities                           |
|---------------|------------------------------------------------------------|-------------------------------------------------------------|------------------------------------------------------------------------|--------------------------------------------|
| 19 Height     | 20 Does/Did the patient smoke?                             | 21 Is the patient in the pre- or post menopause phase?      | 22 Does the patient present predisposing mutations for cancer?         | 23 Does the patient present comorbidities? |
| 24 Weight     | 25 If yes, for how many years?                             | 26 Age at menarche                                          | 27 If yes, which one                                                   | 28 If yes, which ones?                     |
| 29 BMI        | 30 Packets/day                                             | 31 Number of pregnancies                                    | 32 Does the patient have familiarity for breast and/or ovarian cancer? |                                            |
|               | 33 Years since the last cigarette                          | 34 Does the patient assume substitutive endocrine therapy?  |                                                                        |                                            |
|               | 35 How many alcohol units does the patient assume per day? | 36 If yes, for how many years?                              |                                                                        |                                            |
|               |                                                            | 37 Does the patient assume endocrine contraceptive therapy? |                                                                        |                                            |
|               |                                                            | 38 If yes, for how many years?                              |                                                                        |                                            |

39  
40  
41  
42  
43  
44  
45  
46  
47  
48 **Tab. 1. Items investigated at the recruitment.** Along with items concerning the inclusion and  
49 exclusion criteria, information of interest for the assessment of BC risk and possible  
50 interference with the evaluation of circulating biomarkers will be annotated.  
51  
52  
53  
54  
55

## 56 References

57  
58  
59  
60



- 1 Sprague BL, Arao RF, Miglioretti DL, *et al.* National Performance Benchmarks for  
2 Modern Diagnostic Digital Mammography: Update from the Breast Cancer Surveillance  
3 Consortium. *Radiology* 2017;**283**:59–69. doi:10.1148/radiol.2017161519  
4  
5  
6  
7  
8  
9
- 10 Tagliafico AS, Calabrese M, Mariscotti G, *et al.* Adjunct Screening With Tomosynthesis  
11 or Ultrasound in Women With Mammography-Negative Dense Breasts: Interim Report  
12 of a Prospective Comparative Trial. *J Clin Oncol* 2016;**34**:1882–8.  
13  
14  
15  
16  
17  
18  
19  
20  
21  
22  
23  
24  
25  
26  
27  
28  
29  
30  
31  
32  
33  
34  
35  
36  
37  
38  
39  
40  
41  
42  
43  
44  
45  
46  
47  
48  
49  
50  
51  
52  
53  
54  
55
- 56  
57  
58  
59  
60
- 1 Chung W, Eum HH, Lee H-O, *et al.* Single-cell RNA-seq enables comprehensive tumour  
and immune cell profiling in primary breast cancer. *Nat Commun* 2017;**8**:15081.  
doi:10.1038/ncomms15081
- 2 Bettegowda C, Sausen M, Leary RJ, *et al.* Detection of circulating tumor DNA in early-  
and late-stage human malignancies. *Sci Transl Med* 2014;**6**:224ra24.  
doi:10.1126/scitranslmed.3007094
- 3 Cohen JD, Li L, Wang Y, *et al.* Detection and localization of surgically resectable  
cancers with a multi-analyte blood test. *Science* 2018;**359**:926–30.  
doi:10.1126/science.aar3247
- 4 Best MG, Sol N, Kooi I, *et al.* RNA-Seq of Tumor-Educated Platelets Enables Blood-  
Based Pan-Cancer, Multiclass, and Molecular Pathway Cancer Diagnostics. *Cancer*  
*Cell* 2015;**28**:666–76. doi:10.1016/j.ccell.2015.09.018
- 5 Bhome R, Del Vecchio F, Lee G-H, *et al.* Exosomal microRNAs (exomiRs): Small  
molecules with a big role in cancer. *Cancer Lett* 2018;**420**:228–35.  
doi:10.1016/j.canlet.2018.02.002
- 6 Shen SY, Singhanian R, Fehringer G, *et al.* Sensitive tumour detection and classification  
using plasma cell-free DNA methylomes. *Nature* 2018;**563**:579–83.  
doi:10.1038/s41586-018-0703-0

- 1  
2  
3 9 Kalluri R. The biology and function of exosomes in cancer. *J Clin Invest* 2016;**126**:1208–  
4 15. doi:10.1172/JCI81135  
5  
6  
7  
8 10 Valdora F, Houssami N, Rossi F, *et al*. Rapid review: radiomics and breast cancer.  
9 *Breast Cancer Res Treat* 2018;**169**:217–29. doi:10.1007/s10549-018-4675-4  
10  
11  
12  
13 11 Bhawal R, Oberg AL, Zhang S, *et al*. Challenges and Opportunities in Clinical  
14 Applications of Blood-Based Proteomics in Cancer. *Cancers* 2020;**12**.  
15 doi:10.3390/cancers12092428  
16  
17  
18  
19  
20 12 Alimirzaie S, Bagherzadeh M, Akbari MR. Liquid biopsy in breast cancer: A  
21 comprehensive review. *Clin Genet* 2019;**95**:643–60. doi:10.1111/cge.13514  
22  
23  
24  
25 13 Aravanis AM, Lee M, Klausner RD. Next-Generation Sequencing of Circulating Tumor  
26 DNA for Early Cancer Detection. *Cell* 2017;**168**:571–4. doi:10.1016/j.cell.2017.01.030  
27  
28  
29  
30 14 Bennett NC, Farah CS. Next-generation sequencing in clinical oncology: next steps  
31 towards clinical validation. *Cancers* 2014;**6**:2296–312. doi:10.3390/cancers6042296  
32  
33  
34  
35 15 Stirzaker C, Taberlay PC, Statham AL, *et al*. Mining cancer methylomes: prospects and  
36 challenges. *Trends Genet* 2014;**30**:75–84. doi:10.1016/j.tig.2013.11.004  
37  
38  
39  
40 16 Salomon MP, Orozco JIJ, Wilmott JS, *et al*. Brain metastasis DNA methylomes, a novel  
41 resource for the identification of biological and clinical features. *Sci Data*  
42 2018;**5**:180245. doi:10.1038/sdata.2018.245  
43  
44  
45  
46  
47  
48 17 Anfossi S, Babayan A, Pantel K, *et al*. Clinical utility of circulating non-coding RNAs - an  
49 update. *Nat Rev Clin Oncol* 2018;**15**:541–63. doi:10.1038/s41571-018-0035-x  
50  
51  
52  
53 18 Koh W, Pan W, Gawad C, *et al*. Noninvasive in vivo monitoring of tissue-specific global  
54 gene expression in humans. *Proc Natl Acad Sci U S A* 2014;**111**:7361–6.  
55 doi:10.1073/pnas.1405528111  
56  
57  
58  
59  
60

- 1  
2  
3 19 AACR Project GENIE Consortium. AACR Project GENIE: Powering Precision Medicine  
4 through an International Consortium. *Cancer Discov* 2017;**7**:818–31. doi:10.1158/2159-  
5 8290.CD-17-0151  
6  
7  
8  
9  
10 20 Nuzzo PV, Berchuck JE, Korthauer K, *et al*. Detection of renal cell carcinoma using  
11 plasma and urine cell-free DNA methylomes. *Nat Med* 2020;**26**:1041–3.  
12 doi:10.1038/s41591-020-0933-1  
13  
14  
15  
16  
17 21 Nassiri F, Chakravarthy A, Feng S, *et al*. Detection and discrimination of intracranial  
18 tumors using plasma cell-free DNA methylomes. *Nat Med* 2020;**26**:1044–7.  
19 doi:10.1038/s41591-020-0932-2  
20  
21  
22  
23  
24 22 Shen SY, Burgener JM, Bratman SV, *et al*. Preparation of cfMeDIP-seq libraries for  
25 methylome profiling of plasma cell-free DNA. *Nat Protoc* 2019;**14**:2749–80.  
26 doi:10.1038/s41596-019-0202-2  
27  
28  
29  
30  
31 23 Webber J, Stone TC, Katilius E, *et al*. Proteomics analysis of cancer exosomes using a  
32 novel modified aptamer-based array (SOMAscan™) platform. *Mol Cell Proteomics*  
33 2014;**13**:1050–64. doi:10.1074/mcp.M113.032136  
34  
35  
36  
37  
38  
39 24 Raffield LM, Dang H, Pratte KA, *et al*. Comparison of Proteomic Assessment Methods in  
40 Multiple Cohort Studies. *Proteomics* 2020;**20**:e1900278. doi:10.1002/pmic.201900278  
41  
42  
43  
44 25 Lambin P, van Stiphout RGPM, Starmans MHW, *et al*. Predicting outcomes in radiation  
45 oncology--multifactorial decision support systems. *Nat Rev Clin Oncol* 2013;**10**:27–40.  
46 doi:10.1038/nrclinonc.2012.196  
47  
48  
49  
50  
51 26 Dietterich TG. Machine-learning research; four current directions. <https://go.gale.com> ›  
52 [i.dohttps://go.gale.com](https://go.gale.com) › [i.do](https://go.gale.com)  
53  
54 1997;**18**:97+. [https://go.gale.com/ps/i.do?id=GALE%7CA20475202&sid=googleScholar&](https://go.gale.com/ps/i.do?id=GALE%7CA20475202&sid=googleScholar&v=2.1&it=r&linkaccess=abs&issn=07384602&p=AONE&sw=w)  
55  
56  
57  
58  
59  
60

- 1  
2  
3 27 Thrun S, Pratt L. Learning to Learn: Introduction and Overview. In: Thrun S, Pratt L,  
4 eds. *Learning to Learn*. Boston, MA: : Springer US 1998. 3–17. doi:10.1007/978-1-  
5 4615-5529-2\_1  
6  
7  
8  
9  
10 28 Dobbin KK, Simon RM. Sample size planning for developing classifiers using high-  
11 dimensional DNA microarray data. *Biostatistics* 2007;**8**:101–17.  
12  
13 doi:10.1093/biostatistics/kxj036  
14  
15  
16  
17 29 Dobbin KK, Zhao Y, Simon RM. How large a training set is needed to develop a  
18 classifier for microarray data? *Clin Cancer Res* 2008;**14**:108–14. doi:10.1158/1078-  
19 0432.CCR-07-0443  
20  
21  
22  
23  
24 30 Qiu J, Xu J, Zhang K, *et al*. Refining Cancer Management Using Integrated Liquid  
25 Biopsy. *Theranostics* 2020;**10**:2374–84. doi:10.7150/thno.40677  
26  
27  
28  
29  
30  
31  
32  
33  
34  
35  
36  
37  
38  
39  
40  
41  
42  
43  
44  
45  
46  
47  
48  
49  
50  
51  
52  
53  
54  
55  
56  
57  
58  
59  
60

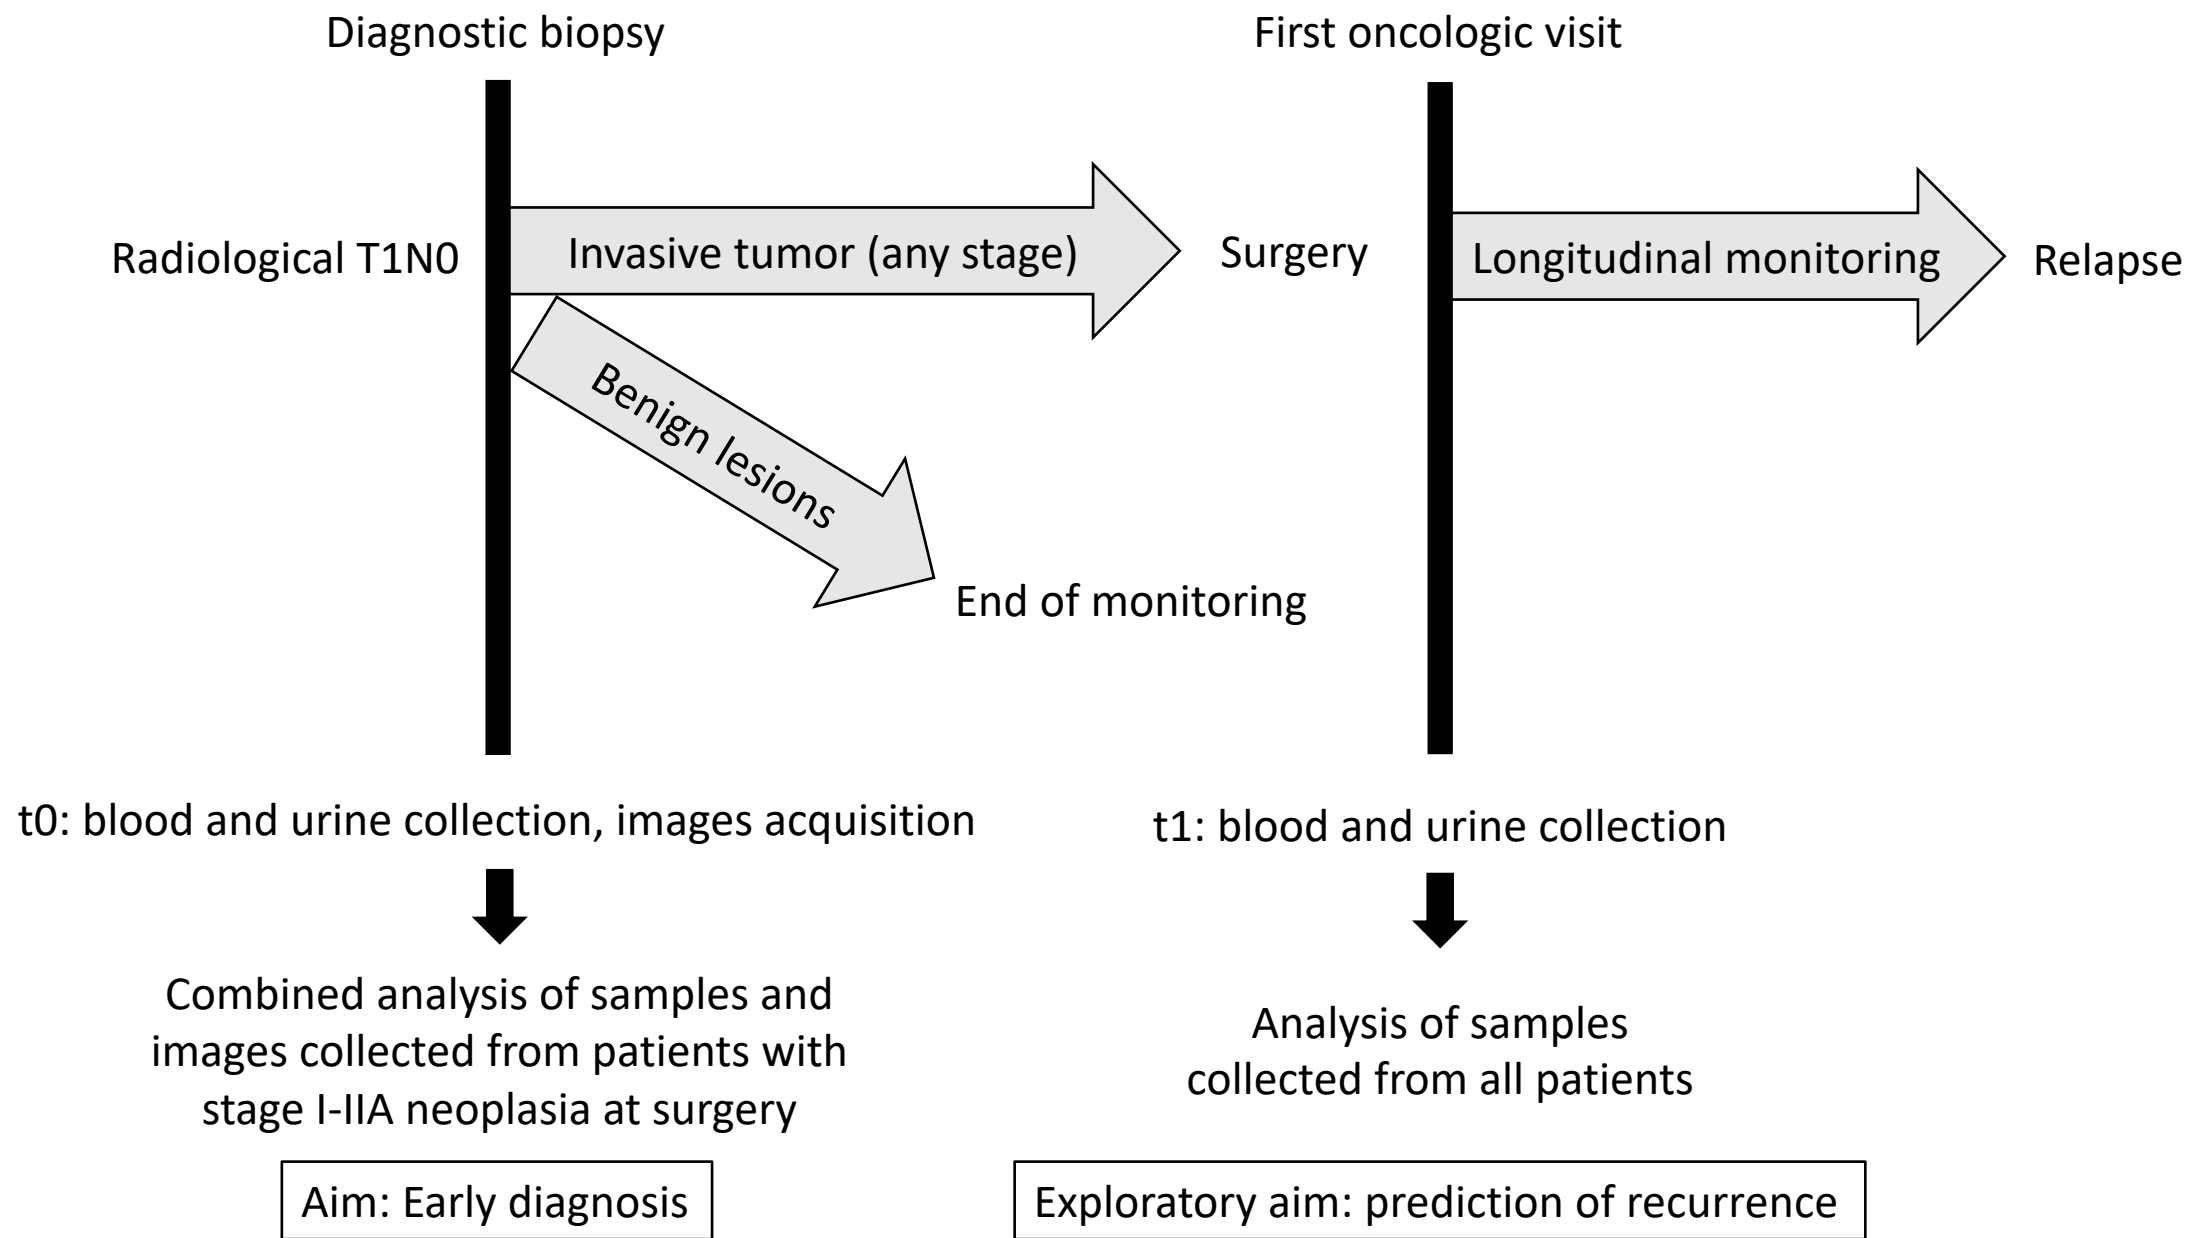

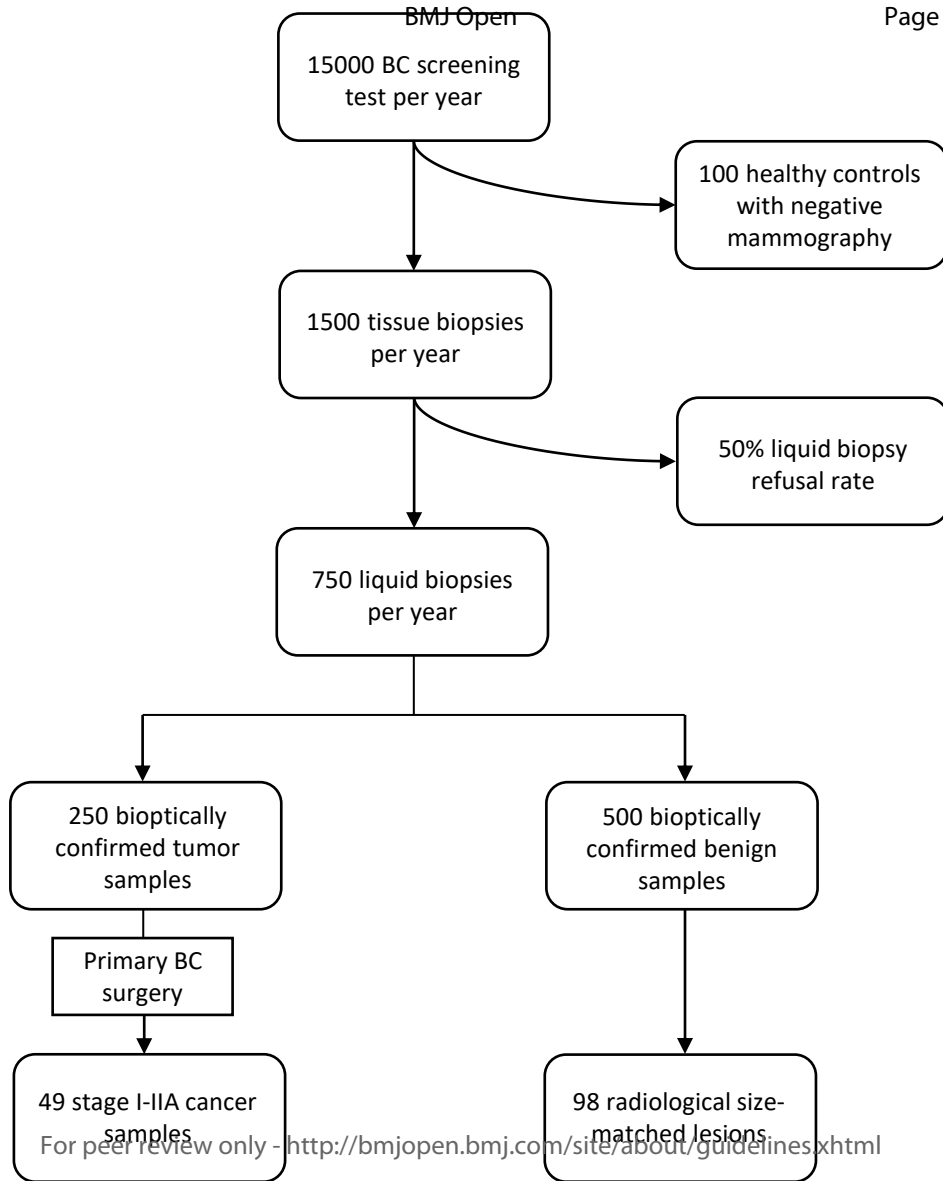

1  
2  
3  
4  
5  
6  
7  
8  
9  
10  
11  
12  
13  
14  
15  
16  
17  
18  
19  
20  
21  
22  
23  
24  
25  
26  
27  
28  
29  
30  
31  
32  
33  
34  
35  
36
